1 **Running title:** ERECTA- and mucilage-mediated control of seed germination

2

3

4 **Timing seed germination under changing salinity: a key role of the ERECTA receptor-**  
5 **kinases**

6

7 Amrit K. Nanda<sup>a</sup> Abdeljalil El Habti<sup>a</sup>, Charles Hocart<sup>a</sup> and Josette Masle<sup>a,\*</sup>

8

9

10

11 **Authors' Affiliation:**

12 <sup>a</sup>Research School of Biology, The Australian National University, Canberra ACT, Australia

13

14 \* **Corresponding author:** [Josette.Masle@anu.edu.au](mailto:Josette.Masle@anu.edu.au)

15

16

17

18

19

20

21

22

23 **Highlight**

24 The ERECTA family of receptor-kinases regulates seed germination under salinity, through  
25 mucilage-mediated sensing of conditions at the seed surface, and interaction with secondary  
26 dormancy mechanisms.

27

28 **Abstract**

29 Appropriate timing of seed germination is crucial for the survival and propagation of plants,  
30 and for crop yield, especially in environments prone to salinity or drought. Yet, how exactly  
31 seeds perceive changes in soil conditions and integrate them to trigger germination remains  
32 elusive, especially once non-dormant. Here we report that the *Arabidopsis* ERECTA (ER),  
33 ERECTA-LIKE1 (ERL1) and ERECTA-LIKE2 (ERL2) leucine-rich-repeat receptor-like  
34 kinases synergistically regulate germination and its sensitivity to salinity and osmotic stress.  
35 Loss of *ER* alone, or in combination with *ERL1* and/or *ERL2* slows down the initiation of  
36 germination and its progression to completion, or arrests it altogether until better conditions  
37 return. That function is maternally controlled via the embryo surrounding tissues, primarily  
38 the properties of the seed coat determined during seed development on the mother plant, that  
39 relate to both seed coat expansion and subsequent differentiation, particularly the formation  
40 of its mucilage. Salt-hypersensitive *er*, *er erl1*, *er erl2* and triple mutant seeds also exhibit  
41 increased sensitivity to ABA during germination, and under salinity show an enhanced  
42 upregulation of the germination repressors and inducers of dormancy *ABA-insensitive-3*,  
43 *ABA-insensitive-5*, DELLA encoding *RGL2* and *Delay-Of-Germination-1*. These findings  
44 reveal a novel role of the ERECTA kinases in the sensing of conditions at the seed surface  
45 and the integration of developmental and stress signalling pathways in seeds. They also open  
46 novel avenues for the genetic improvement of plant adaptation to harsh soils.

47

48 **Key-words**

49 Seed germination; salinity; osmotic stress; drought; ERECTA genes; receptor-kinases;  
50 mucilage; environmental sensing; abiotic stress signalling; seed dormancy; seed size

## 51 **Introduction**

52 Seed germination is a vital life-cycle transition in plants. When and under which conditions it  
53 occurs, largely determine survival, reproductive success, yield and ability to expand. To  
54 maximise chances of timely germination under favourable conditions, seeds have evolved  
55 mechanisms for dormancy, a state that prescribes the environmental conditions that need to  
56 occur before germination can take place (Bewley, 1997; Baskin and Baskin, 2004; Finch-  
57 Savage and Leubner-Metzger, 2006). As dormancy fades over time, or is lifted by  
58 appropriate cues, water becomes the most critical requirement for successful germination, in  
59 interaction with temperature (Alvarado and Bradford, 2002). As soon as moisture contacts it,  
60 the highly desiccated seed imbibes like a sponge. Seed imbibition reactivates metabolism and  
61 enables embryo expansion and rupture of its protective tissues. In *Arabidopsis thaliana*, this  
62 occurs in two separate steps, the rupture of the testa, or seed coat, a dead tissue, and then  
63 endosperm rupture (Liu et al., 2005; Müller et al., 2006). Embryo reactivation and  
64 weakening of surrounding tissues are tightly coordinated, through complex biochemical and  
65 hormonal pathways, with a prominent role of abscisic acid (ABA) and gibberellins (GAs), in  
66 interaction with ethylene, brassinosteroids and reactive oxygen species (ROS) (Koorneef  
67 and Van der Veen, 1980; Steber and McCourt, 2001; Bailly, 2004; Finch-Savage and  
68 Leubner-Metzger, 2006; Kucera et al. 2005; Finkelstein et al., 2008; Weitbrecht et al., 2011;  
69 Rajjou et al., 2012; Yu et al., 2016). ABA inhibits germination whereas GAs promote it,  
70 through regulation of inter-signalling between seed coat, endosperm, and embryo, in a  
71 feedback loop involving DELLA proteins and interactions with cell-wall remodelling  
72 enzymes (Müller et al., 2006; Stamm et al., 2012; Graeber et al., 2014; Nonogaki, 2014).

73 Drought and salinity stress are two inter-related and widespread conditions in natural  
74 environments, and major causes of germination failure, poor crop establishment and yield  
75 loss (Boyer, 1982; Bradford K.J., 1990; Finch-Savage and Leubner-Metzger, 2006;  
76 Yamaguchi and Blumwald, 2005; Munns and Tester, 2008). The high vulnerability of seeds  
77 to these stresses has long-been recognised. Yet, the molecular controls remain poorly  
78 understood, apart from evidence for a deregulation of ABA-GA homeostasis and an  
79 impairment of ethylene and ROS signalling (Lopez-Molina et al., 2001; Kim et al., 2008;  
80 Yuan et al. 2010 ; Yu et al., 2016). Natural genetic variation in seed germination under  
81 optimal conditions, drought or salinity has been widely documented, and numerous QTLs  
82 identified (e.g. Quesada et al., 2002; Clerckx et al., 2004; Galpaz and Reymond, 2010; Wang  
83 et al., 2010; DeRose-Wilson and Gaut, 2011; Yuan et al., 2016). This demonstrates the

84 potential for genetic improvement, but also the complexity of the underlying molecular  
85 pathways. While the genetic dissection of seed dormancy has received much attention, very  
86 few genes have been demonstrated to control the germination of non-dormant seeds to tune it  
87 to prevailing soil conditions (Kim et al., 2008; Ren et al., 2010; Yu et al., 2016). How seeds  
88 monitor their surroundings, how this information is communicated to their inner  
89 compartments and modulates the intricate communication between them and the environment  
90 that timely germination requires, remains little known (Donohue et al., 2010).

91 Receptor-like protein kinases (RLKs) at the cell plasma membrane play major roles in signal  
92 perception and transduction to downstream intra- and inter-cellular signalling networks. A  
93 vast array of RLKs are encoded by plant genomes (Shiu et al., 2004). Among them are  
94 Leucine-Rich-Repeat Receptor-Like Kinases (LRR-RLKs) which form a large family of  
95 receptor proteins characterised by an extra-cellular receptor domain, a trans-membrane  
96 domain and an intra-cellular kinase domain for signal transduction through phosphorylation  
97 cascades. The few that have been characterised provide evidence for central functions in  
98 integrating developmental, hormonal, and abiotic stress or defence signalling pathways  
99 (Becraft, 2002; Osakabe et al., 2013). Scant information is available on RLKs in seeds, even  
100 though developing seeds show high abundance of secreted peptides and recent studies point  
101 to the importance of peptide-mediated signalling in inter-compartmental coordination during  
102 seed development (Ingram and Gutierrez-Marcos, 2015).

103 The *Arabidopsis ERECTA* gene family (*ERf*) encodes three closely related LRR-RLKs - *ER*,  
104 *ERL1* and *ERL2* - known to synergistically regulate many aspects of plant development and  
105 morphogenesis with prominent roles in organ shape, stomatal patterning, cell proliferation  
106 and meristematic activity (Torii et al., 1996; Shpak et al., 2004; 2005; Pillitteri et al., 2007;  
107 Uchida et al., 2012; Bemis et al., 2013; EtcHELLS et al., 2013; Ikematsu et al., 2016), as well as  
108 being involved in some pathogenic responses (Godiard et al., 2003; Llorente et al., 2005;  
109 Jordá et al., 2016). In contrast, little is known of its function in abiotic stress responses,  
110 beyond a role in leaf heat tolerance (Shen et al. 2015). We earlier reported a role of *ERECTA*  
111 as a major controller of water use efficiency, under both well watered and drought conditions  
112 (Masle et al., 2005). That function appears to be broadly conserved in diverse species (Xing  
113 et al., 2011; Zheng et al., 2015), and is suggestive of an important adaptive role of the *ERf* to  
114 abiotic stress. Here we probe the *ERf* function during germination, a key switch that is  
115 extremely sensitive to variations in osmotic and ionic soil conditions, both of which vary  
116 widely in nature.

## 117 **Material and Methods**

### 118 **Plant material and growth conditions**

119 *Arabidopsis thaliana* Columbia (Col-0, CS1093) was used as wild type (WT), alongside two  
120 independent sets of single, double and whole ERECTA family loss-of-function mutants: one  
121 carrying the previously characterised mutations *er105*, *erl1-2*, *erl2-1*, in the *ER* (At2g26330),  
122 *ERL1* (At5g62230) and *ERL2* (At5g07180) genes, respectively (Torii et al., 1996; Shpak et  
123 al., 2004; Masle et al., 2005; Bundy et al., 2012; Bemis et al., 2013) and here coded *er*, *erl1*  
124 and *erl2* for simplicity; the other carrying the *er2* (C3401) mutation (Rédei, 1992; Lease et  
125 al., 2001; Masle et al., 2005; Hall et al., 2007), and the *erl1-5* (SALK\_019567) and *erl2-2*  
126 (SALK\_015275C) insertional mutations from the SALK Institute collection (Alonso et al.  
127 2007). Absence of residual target gene expression in the latter two lines was confirmed, and  
128 T-DNA insertion sites verified (insertion located 4605 bp and 2775 bp from *ERL1* and  
129 *ERL2* start codon in *erl1-5* and *erl2-2*, respectively).

130 Double and triple *erf* mutants were generated through crosses. As the triple mutants are  
131 sterile, the segregating progeny of *er erl1/+ erl2*, or *er2 erl1-5+/- erl2-2* was used to  
132 investigate germination of triple mutant seeds, and is referred to in text and figures as *er*  
133 *erl1/seg erl2* or *er2 erl1-5/seg erl2-2*, respectively.

134 All seeds in any given experiment were of the same age and harvested from spaced plants  
135 grown together, under the same conditions (21°C constant temperature; 12 or 16 h day length,  
136 depending on experiment; 120-130  $\mu\text{mol quanta m}^{-2} \text{s}^{-1}$  light intensity). For investigation of  
137 parent-of-origin effects on seed germination and seed size, seeds were manually excised from  
138 tagged mature siliques, of the same age and same position on the primary inflorescence.

139

### 140 **Germination assays**

141 All assays were done using seeds stratified by moist chilling at 4°C to remove residual  
142 dormancy. Seeds were surface-sterilised and sown on 0.7% agar media supplemented with  
143 Hoagland's nutrient solution (2 mM KNO<sub>3</sub>, 5 mM Ca[NO<sub>3</sub>]<sub>2</sub>·4H<sub>2</sub>O, 2 mM MgSO<sub>4</sub>·7H<sub>2</sub>O, 2  
144 mM KH<sub>2</sub>PO<sub>4</sub>, 0.09 mM Fe-EDTA and micronutrients) pH 5.8, and NaCl or KCl in desired  
145 concentrations. For germination assays under iso-osmotic conditions generated by PEG8000  
146 or NaCl, seeds were plated on filter paper imbibed with solutions of NaCl or PEG8000

147 dissolved in water. The osmotic pressure ( $\pi_e$ ) of the basal medium or NaCl- or KCl-  
148 containing media was calculated using the classic van't Hoff equation and verified  
149 experimentally using a VAPRO vapour pressure osmometer (Wescor Inc.). The  
150 concentrations of PEG8000 required to obtain a given  $\pi_e$  were determined from a calibration  
151 curve of  $\pi_e$  as a function of [PEG] using the same instrument. Seeds WT and all *erf* mutant  
152 combinations were sown in equal number ( $n \geq 33$ ) within each of 3 to 4 plates (total  $n = 100$  to  
153 120 seeds per line per treatment and experiment). After stratification at 4°C, in the dark for 2-  
154 3 days, plates were exposed to continuous light ( $100\text{-}115 \mu\text{mol quanta m}^{-2} \text{s}^{-1}$ ) and a constant  
155 21°C temperature. “Demucilaged” seeds were sown straight after mucilage removal (see  
156 protocol below), and kept at 4°C in darkness for an additional day, so as to keep total  
157 stratification time to 48 h, as for control intact seeds.

158 Seeds were individually scored for both testa and endosperm rupture (germination *sensu*  
159 *stricto*) under a binocular microscope, within the growth chamber, and at 3-4 h intervals until  
160 all seeds on control plates (0 mM NaCl) had germinated (i.e. 30 hours at most), or three times  
161 to once daily, as appropriate on NaCl, KCl, or PEG plates, until no change in scores was  
162 observed. Data are represented either as percentages of seeds exhibiting testa or endosperm  
163 rupture as a function of incubation time post-stratification, or as  $T_{50}$  values, corresponding to  
164 the times (h post-stratification) when 50% of seeds showed testa or endosperm rupture  
165 (Bewley et al., 2013).

166

### 167 **Embryo culture**

168 Mature embryos were excised from dry seeds pre-imbibed with water for 1-2 h, briefly rinsed  
169 twice in water to remove endosperm debris and plated on either 0 or 150 mM NaCl media,  
170 placed in the dark at 4°C for 3 d, before transfer to the growth chamber. Embryos were  
171 individually imaged at the time of transfer and again 72h later using a LEICA M205 FA  
172 microscope fitted with a DFC 550 camera (LEICA Instruments). Relative embryo expansion  
173 rates over that 72 h interval were calculated from measurements of projected areas using  
174 *ImageJ* software.

175

### 176 **Staining procedures**

177 GUS histochemical staining of seeds from *proERf::GUS* reporter lines (Shpak et al., 2004)  
178 was performed on embryos dissected from dry and germinating seeds sampled from 0 and  
179 150 mM NaCl plates. Staining was done as described (Sessions et al., 1999).

180 For tetrazolium permeability assays (Debeaujon and Koornneef, 2000) dry seeds were  
181 incubated in the dark in an aqueous solution of 1% (w/v) tetrazolium red (2,3,5-  
182 triphenyltetrazolium chloride, Sigma-Aldrich) at 30°C for 4, 24, 48, 72 and 120 h, and then  
183 rinsed twice with deionised water, resuspended in 95% ethanol and quickly ground to extract  
184 formazans. The final volume was adjusted to 2 ml with 95% ethanol, followed by  
185 centrifugation at 15000 g and measurement of supernatant's absorbance at 485 nm, using a  
186 Tecan Infinite M1000 Pro spectrophotometer (Tecan Trading AG, 2008). Each sample was  
187 assayed in triplicates.

188 Mucilage ruthenium red staining was performed as described ([http://www.bio-](http://www.bio-protocol.org/e1096)  
189 [protocol.org/e1096](http://www.bio-protocol.org/e1096)). Ruthenium red stains acidic pectins (Hanke and Northcote, 1975) and is  
190 widely used to stain *Arabidopsis* seed mucilage (Western et al., 2000; Penfield et al., 2001).

191

## 192 **Profiling fatty acid methyl esters derived from lipids stored in the embryo**

193 Fifty mature embryos were dissected from dry seeds after 1 h imbibition in water, in 4  
194 replicates per genotype. Fatty acid methyl esters (FAMES) were prepared by direct  
195 transesterification as described by James et al. (2011). Embryos were placed in a reacti-vial  
196 (1.5mL) fitted with a Teflon-lined cap. To this was added  $\text{CHCl}_3$  (50  $\mu\text{L}$ ) followed by the  
197 internal standard, heptadecanoic acid (C17:0, 15  $\mu\text{L}$ , 9.66 mg in 25mL  $\text{CHCl}_3$ ), and  
198 methanolic HCl (3M, 500  $\mu\text{L}$ ). The samples were mixed and heated at 90 °C for 60 min, and  
199 then allowed to cool before being washed into glass tubes with  $\text{CHCl}_3$ . Water (1 mL) was  
200 added to each tube and the FAMES extracted (hexane:chloroform, 4:1 v/v, 3 x 1 mL). The  
201 extracts were combined and washed with water (200  $\mu\text{L}$ ). The organic phase was then dried  
202 with anhydrous  $\text{Na}_2\text{SO}_4$ , decanted and evaporated under nitrogen. The residue was dissolved  
203 in  $\text{CH}_2\text{Cl}_2$  (150  $\mu\text{L}$ ) and transferred to GC/MS auto-sampler vials for analysis.

204

## 205 **Mucilage extraction and analysis**

206 Mucilage extraction was performed on aliquots of 40 mg dry seeds. Each aliquot (n=4 per  
207 genotype per experiment) was suspended in 1ml milliQ water, followed by shaking at 500  
208 rpm for 24 h at 4°C, vortex for 5 s, and centrifugation at 8000 g for 3 mins. 600 µl  
209 supernatant was recovered. Seeds were rinsed twice with 200 µl water, and 200 µl  
210 supernatant was recovered after vortexing and centrifugation. The pooled supernatants (1ml  
211 total volume) was snap-frozen in liquid nitrogen and immediately lyophilised. The mucilage  
212 thus recovered was weighed on a 10<sup>-6</sup> g high precision micro-balance. Given the observed  
213 genetic variation in seed size (see Text), sub-aliquots of a known number of seeds (at least  
214 500) were weighed, imaged at high resolution and analysed for size with *ImageJ* prior to  
215 mucilage extraction, allowing derivation of average mucilage amount per seed. The  
216 reductions of uronic acid methyl-esters and free uronic acids in the extracted mucilage were  
217 carried out following established protocols (Kim and Carpita, 1992; Pettolino et al., 2012).  
218 The reduced polysaccharides were then hydrolysed, reduced, acetylated and subjected to  
219 GC/MS analysis as described (Peng et al., 2000) .

220

#### 221 **Analysis of seed sodium content**

222 Dry seeds (3 biological replicates of 10 mg seeds each were per genotype and treatment)  
223 were imbibed and stratified at 4°C in the dark in a 0 or 150 mM NaCl solution for two days  
224 followed by 24 h at room temperature with shaking. Seeds were rinsed 3 times with 2 ml  
225 water, freeze-dried, weighed and microwave-digested for 2 h in 4 ml of 20% nitric acid at  
226 175°C (USAP Method 3051). Digest volumes were diluted to a final volume of 5 ml. Sodium  
227 ions were measured by ICP-OES (Varian Vista-Pro CCD Simultaneous).

228

#### 229 **Quantitative RT-PCR**

230 Total RNA was extracted from dry, imbibed or germinating seeds using TRIzol reagent  
231 (Invitrogen). mRNA isolation and reverse transcription were done as described (Chen et al.,  
232 2018). Primer sequences are given in Supplementary Table 1. The analysis was done on four  
233 biological replicates per genotype, time point and treatment, of 300 seeds each, sampled from  
234 4 plates where all genotypes compared were represented. Target gene expression levels were  
235 normalised to the geometric mean of expression levels of four reference genes, *APT1*  
236 (*At1g27450*), *PDF2* (*At1g13320*), *bHLH* (*At4g38070*), and *PPR* (*At5g55840*). Gene



237 expression was measured just before sowing (“Dry” seeds) and then at: the end of seed  
238 imbibition and stratification (germination stage I); 20 h later (stage II, testa rupture); and 52 h  
239 later (stage III-G, endosperm rupture; seeds non-germinated yet, III-NG, were analysed  
240 separately). Seeds were sampled within the cold room or growth room (dry seeds and stage I  
241 to III, respectively), within 5 minutes from start to finish for each plate, and immediately  
242 snap-frozen in liquid nitrogen. The experiment was repeated three times.

243

## 244 **Statistical analysis**

245 Statistical significance of results was analysed using the Statistix 9 software (Analytical  
246 Software, Tallahassee, USA). For multivariate comparison of mucilage composition profiles,  
247 discriminant Orthogonal Projected Latent Structure (OPLS) analysis was carried out using  
248 the SIMCA software (Umetrics, [www.umetrics.com](http://www.umetrics.com)) with salinity as a quantitative variable.

249

## 250 **Results**

### 251 **The ERf controls the timing and pace of germination in response to changing salinity** 252 **and osmotic conditions**

253 Loss of ER/ERL function had no effect on testa nor endosperm rupture on 0 mM NaCl  
254 media, except in *er erl1* seeds which showed a small but systematic lag in testa rupture (Fig.  
255 1 and Supplementary Fig. S1A-B). That lag carried through to the next germination phase  
256 leading to radicle protrusion. Salinity delayed germination in a dose-dependent manner  
257 (Supplementary Fig. S2A, B), as expected, but with striking differences among lines (Fig. 1  
258 and Supplementary Fig. S1C-D). Wild type (WT), *erl1*, *erl2* and *erl1 erl2* seeds germinated  
259 first, ahead of *er*, *er erl2*, *er erl1* and finally *er erl1/seg erl2* seeds, due to both delayed testa  
260 rupture and slower progression to endosperm rupture. Similar results were obtained with an  
261 independent set of *erf* knock-out mutants carrying different *erf* null alleles (Supplementary  
262 Fig. S3). This demonstrates that the observed genetic variations in seed germination are  
263 causally related to disruption of the *ERf* genes. Similar germination kinetics were also  
264 obtained regardless of whether seeds were challenged with salinity stress post-stratification or  
265 directly from sowing (Fig. 2A-D). Strikingly, when exposed to 150 mM NaCl once  
266 germinated, all genotypes displayed similar sensitivity to salinity stress (Fig. 2E). Together,

267 these data demonstrate a germination-specific function of the ERf in the sensing and  
268 signaling of salinity stress. That function requires ER but involves the three family members,  
269 in a non-totally redundant manner.

270 *ERf* expression during seed germination has not been reported. To investigate it, we  
271 examined *ERf* promoter activity in transgenic seeds expressing *proERf:GUS* constructs  
272 (Supplementary Fig. S4). *ERf* expression patterns did not appear to be influenced by salinity,  
273 but differed among family members, with *ERL2* expression seen only in the cotyledons and  
274 the shoot apical meristem, while *ER* and *ERL1* promoter activities were also detected in the  
275 hypocotyl. Measurements of transcript abundance by RT-qPCR (Fig. 3) confirmed the  
276 presence of *ERf* transcripts in dry seeds and showed a strong and early induction of *ER* and  
277 *ERL1* expression during stratification and imbibition (germination phase I), and the next  
278 phase (stage II) leading to testa rupture, while *ERL2* remained lowly expressed. Salinity  
279 induced *ER* expression, especially during germination phase III, leading to radicle protrusion,  
280 but had little influence on *ERL1* or *ERL2* expression. These results support a role of the ERf  
281 throughout germination, with specificity among family members.

282 Salinity induces both osmotic and ionic stress (Munns and Tester, 2008). To investigate the  
283 contributions of these two components, we next examined germination responses to  
284 Polyethylene Glycol (PEG)8000 - a high molecular weight non-permeating osmoticum  
285 mimicking drought-induced osmotic stress-, in the salinity hyper-sensitive mutants, *er*, *er*  
286 *erl1*, *er erl2* and *er erl1/seg erl2*. Under iso-osmotic external conditions (media osmotic  
287 pressure,  $\pi_e$ ), seed germination was significantly less inhibited by PEG than NaCl. Up to  
288 0.50 MPa  $\pi_e$  (equivalent to 100 mM NaCl), PEG was innocuous (Fig. 4A). When, however,  
289 PEG was provided at higher concentrations raising  $\pi_e$  to 0.74 and 0.99 MPa (iso-osmotic  
290 conditions with 150 and 200 mM NaCl, respectively), germination was slowed down but to a  
291 greater extent in the double and triple mutants than WT. Nevertheless, the germination delay  
292 was mild, of the order of 1 day. By d3 post-stratification, germination was complete (WT, *er*,  
293 *er erl1* and *er erl2* seeds) or near complete (*er erl1/seg erl2* seeds, 90% germination), even  
294 under 0.99 MPa (Fig. 4A-B), in contrast to the strong to total germination inhibition observed  
295 under 200 mM NaCl, at the same  $\pi_e$  (Fig. 4C, Supplementary Fig. S2A, B). Only at much  
296 higher PEG concentrations was as severe an inhibition observed, but some seeds still  
297 germinated (Fig. 4B). Taken together, these data indicate that 1) in the germination-  
298 permissive range of NaCl concentrations, the ERf modulates seed germination sensitivity to

299 salinity mostly via interactions with NaCl ionic effects; 2) however, the ER is also involved  
300 in the control of germination sensitivity to osmotic and hyper-osmotic stress.

301 The NaCl-hypersensitive *erf* mutants also exhibited increased sensitivity to KCl, but to a  
302 much lower extent than to NaCl under iso-osmotic conditions (Fig. 5). This result indicates  
303 that the ERF function in seed germination under salinity predominantly relates to effects of  
304 the sodium ion.

305

306 Notably, while all or the vast majority of WT, *erl1*, *erl2*, *erl1 erl2* seeds plated on NaCl  
307 medium eventually germinated (90 to 100%, similar to salt-free media), a significant  
308 proportion of *er*, *er erl1*, *er erl2* and *er erl1/seg erl2* seeds failed to do so, even after a  
309 lengthy incubation period (Fig. 6; Supplementary Fig. S1). Among those, a majority (up to  
310 70%) did not even exhibit testa rupture. To test whether these were damaged or dead seeds,  
311 we transferred them to NaCl-free media. Most germinated readily, within 20-25 h (Fig. 6),  
312 bringing the final percentage of germinated seeds to similar levels as those observed for seeds  
313 never exposed to salt. Failure to germinate on saline media was thus not due to irreversible  
314 cellular damage and loss of seed viability, but rather to a slower or halted progression of the  
315 germination process. Consistent with their maintained viability and fast germination upon  
316 salinity stress release, seeds with arrested germination on salty media showed similar *ERF*  
317 expression levels as germinated seeds (*ERL1* and *ERL2* genes) or even higher (*ER*), (Fig. 3,  
318 comparison of III-NG to III-G seeds).

319

### 320 **The ERF affects the ABA and GA regulation of seed germination**

321

322 Salinity and osmotic stress promote ABA signalling and biosynthesis during germination  
323 (Seo et al., 2006; Piskurewicz et al., 2008; Yuan et al., 2010). ABA is a strong inhibitor of  
324 seed germination. To test whether the ERF-mediated differences in germination sensitivity to  
325 salinity stress are ABA-related, we compared germination kinetics of WT and *erf* seeds in the  
326 presence of ABA. ABA treatment consistently had a mild delaying effect on testa rupture,  
327 which was most pronounced for *er erl1* seeds (Fig. 7A). ABA strongly inhibited endosperm  
328 rupture also in an ERF-dependent manner (Fig. 7B). *er erl1* seed germination was the most  
329 sensitive to ABA, lagging behind WT even in the 1 $\mu$ M ABA range. Under higher ABA  
330 concentrations, seeds of the other two salt-hypersensitive mutants, *er erl2* and *er erl1/seg*  
331 *erl2*, but not *er*, also separated from WT, showing enhanced ABA sensitivity. Interestingly,

332 so did the salinity non -hypersensitive *erl1 erl2* seeds (Fig. 7B). These data indicate the  
333 involvement of both ABA-dependent and ABA-independent pathways in the ERF-mediated  
334 sensitivity of seed germination to salinity.

335

336 The germination inhibiting effect of ABA is antagonised by GAs (Koornneef et al., 1982;  
337 Holdsworth et al., 2008; Weitbrecht et al., 2011; Liu et al., 2016). Rather than the absolute  
338 levels of these hormones, the ABA/GA balance is key to the commitment of seeds to  
339 germinate. The DELLA RGL2 protein plays a pivotal role in the cross-talk between ABA and  
340 GA signalling in the imbibed seed. RGL2 acts as the main GA signalling repressor through  
341 activation of a number of transcriptional regulators, including ABI3 and ABI5, the central  
342 effectors of ABA signalling, establishment of dormancy, and repression of seed germination  
343 (Lopez-Molina et al. 2001, 2002; Lee et al., 2002; Piskurewicz et al. 2008, 2009; Liu et al.  
344 2016). ABI3 and ABI5 are also involved in the regulation of early seedling growth arrest  
345 under water stress in Arabidopsis (Lopez-Molina et al. 2001; 2002), and in the reversible  
346 inhibition of germination in related *E.salsugineum* under salinity (Kazachkova et al., 2016).  
347 To better understand the interaction of the ERF with the ABA regulation of seed germination  
348 we monitored the expression of *ABI3*, *ABI5* and *RGL2* in WT and *er erl1/seg erl2* seeds  
349 during germination, and also of *DELAY OF GERMINATION1 (DOG1)*, a pivotal seed  
350 dormancy gene which genetically interacts with ABI3 and with a central type 2C protein  
351 phosphatase of the ABA signalling pathway during germination, and also regulates ABI5  
352 expression (Dekkers et al. 2016; Née et al., 2017; Nishimura et al. 2018). Constitutive gene  
353 expression levels were similar in WT and mutant seeds. Salinity systematically caused an up-  
354 regulation of gene expression, but that was stronger in *er erl1/seg erl2* seeds than WT (Fig.  
355 7C). This result indicates that the ERF-mediated signalling cascade of salinity interacts with  
356 the ABA-GA signalling network of germination and dormancy. We also examined the  
357 expression of ABA and GA biosynthetic genes - *ABA2* and *NCDE4*; *GA3OX1* and *GAOX2*-  
358 respectively. None showed a differential response to salinity between mutant and WT  
359 (Supplementary Fig. S5).

360

361 **The role of the ERF in seed germination partly overlaps with a role in seed size and is**  
362 **primarily maternally controlled**

363

364 Seed germination occurs when the pressure exerted by the turgid expanding embryo radicle  
365 overcomes the mechanical resistance of the surrounding testa and micropylar endosperm

366 (Linkies et al., 2009; Nonogaki, 2014). As *er erl1 erl2* mature embryos have smaller  
367 cotyledons (Uchida et al., 2013), we reasoned that reduced growth potential could be a factor  
368 in the delayed radicle emergence observed in that mutant and possibly the other salt-  
369 hypersensitive *er*, *er erl1*, *er erl2* mutants under salinity and osmotic stress. As a first step to  
370 examine this, we measured seed size as a surrogate for embryo size, since the *Arabidopsis*  
371 embryo occupies most of the seed volume. *er*, *er erl1*, *er erl2* and *er erl1/seg erl2* seeds, i.e.  
372 all salt-hypersensitive seeds, were significantly smaller than WT or *erl1* and *erl2* seeds, and  
373 even smaller than *erl1 erl2* seeds which were larger than WT (Fig. 8A). These data uncover a  
374 function of the ERF in seed size determination. They also suggest a link between the ERF  
375 function in germination sensitivity to salinity and its influence on seed size. However, the fact  
376 that *erl1 erl2* seeds germinate simultaneously with WT seeds in the presence or absence of  
377 salt despite their significant seed size difference, indicates that the link is not absolute.

378

379 We next considered the possibility of developmental defects in the smaller, salinity  
380 hypersensitive *erf* seeds. As expected, homozygous *er erl1 erl2* segregants displayed  
381 reduced, rounder cotyledons and a broader shoot apical meristem, as previously reported  
382 (Uchida et al. 2013). However, their hypocotyl and embryonic root were similar to WT, in  
383 length, number and size of constitutive cells (Supplementary Fig. S6).

384

385 Seeds reserves are essential for successful germination, and in *Arabidopsis* are mostly stored  
386 in cotyledons. Smaller seeds and cotyledons suggest less reserves, which could be responsible  
387 for hypersensitivity to salinity and osmotic stress. To examine this, we quantified fatty acid  
388 methyl esters (FAMES) derived from embryo lipids, which constitute the major fraction of  
389 *Arabidopsis* seed reserves (Penfield et al., 2004; Lionen and Schwender, 2009). There was no  
390 significant genetic difference across the range of genotypes, except for *er erl1/seg erl2* seeds  
391 (15% decrease) and thus, apart from that genotype, no correlation with germination  
392 sensitivity to salt (Supplementary Fig. S7A). The relative proportions of FAMES species  
393 were also similar across genotypes (Supplementary Fig. S7B-C). Taken together, these results  
394 indicate that the delayed or arrested germination of *er*, *er erl1*, *er erl2* and *er erl1/seg erl2*  
395 seeds on saline media was not likely due to reduced embryo size and growth potential *per se*.

396

397 Germination involves complex communication between embryo, seed coat, and intermediate  
398 endosperm –a one cell thin layer in the *Arabidopsis* seed. We therefore next considered a role  
399 of the ERF on seed germination via effects on the embryo surrounding tissues. To investigate

400 that, we took advantage of the different contributions of the maternal and paternal genomes to  
401 the genetic make-ups of the three seed compartments (seed coat ♀ ♀, endosperm ♀ ♀ ♂,  
402 embryo ♀ ♂) and performed reciprocal crosses between WT and the salt-hypersensitive *er*  
403 *erl1* or *er erl2* mutants. These generated F1 seeds with same embryo genotype, but either WT  
404 or mutant seed coat, and predominantly WT or mutant endosperm. The two groups of F1  
405 seeds germinated synchronously on NaCl-free media, but according to significantly different  
406 kinetics when challenged with salinity stress (Fig. 8C). Remarkably, for each cross, F1 seed  
407 germination occurred synchronously with seeds of the maternal parent. This result  
408 demonstrates that the function of the ERf in the regulation of germination sensitivity to  
409 salinity is primarily maternally controlled and mediated by the embryo-surrounding tissues,  
410 in particular the seed coat. Supporting this, when excised from their covering layers, “naked”  
411 *er erl1*, *er erl2* and *er erl1 erl2* mature embryos grew at similar rates as WT embryos,  
412 whether cultured with or without salt (Fig. 8B). F1 seeds also clustered with their maternal  
413 parent on seed size (Fig. 8D), showing the ERf effect on seed size is of maternal origin too,  
414 and strengthening the case for overlap of the ERf-dependent controls of seed size and  
415 germination response to salinity.

416

#### 417 **The ERf-mediated regulation of seed germination involves the seed coat mucilage**

418 Considering what properties of the seed coat the ERf might control to influence germination  
419 in a salinity-dependent manner we first tested for a role in seed coat permeability. To that  
420 end, seeds were incubated in tetrazolium red, a cationic dye classically used to detect seed  
421 coat defects and abnormal permeability (Wharton, 1955; Molina et al., 2008). Similar  
422 staining and tetrazolium salt reduction rates were observed across lines, except for significant  
423 increases in *er erl1* and to a small extent in *erl1* seeds (Fig. 9A), suggestive of increased seed  
424 coat permeability or NADPH-dependent reductase activity in these two mutants. We thus  
425 next measured seed sodium contents after 24 h stratification with or without salt. They  
426 showed no significant genetic variation (Fig. 9B). These results indicate that the observed  
427 differential germination response to salt among *erf* seeds cannot be ascribed to differences in  
428 seed coat permeability and accumulation of sodium ions *per se*.

429 During seed coat differentiation on the mother plant, the specialised epidermal cells secrete  
430 mucilage polysaccharides that line their inner walls and build a central volcano-shaped  
431 columella (Beeckman et al., 2000; Western et al., 2000; Haughn and Western, 2012). Upon



432 hydration, the desiccated, highly hydrophilic mucilage rapidly swells and ruptures the  
433 enclosing outer primary wall, wrapping the seed in a gelatinous capsule traversed by  
434 cellulosic rays radiating from the columella. Mutant seeds affected in mucilage synthesis or  
435 extrusion have been reported to be more sensitive to low water potential during germination  
436 (Penfield et al., 2001; Yang et al., 2010). This prompted us to next examine mucilage release  
437 by WT and *erf* seeds upon imbibition. We collected the loosely adhering mucilage which can  
438 easily be detached from the seed surface, as opposed to the inner, cell wall-bound fraction.  
439 Large genetic variation was observed in the amounts recovered, but that scaled with genetic  
440 variation in seed size (Fig. 9C). Salinity caused a large increase in mucilage extrusion, but of  
441 similar proportion in all genotypes, resulting in a simple translation of the relationship  
442 observed on control media. Consistently, mucilage staining with ruthenium red, a classic dye  
443 that binds pectins, showed a thicker and often darker mucilage halo under saline than control  
444 conditions, but with no indication of variation among genotypes within each treatment  
445 (Supplementary Fig. S8A, B).

446

447 Recent studies suggest the importance for germination of the mucilage physico-chemical  
448 properties and attachment to the seed rather than simply its amount (Rautengarten et al.,  
449 2008; Saez-Aguayo et al., 2013). We thus next analysed mucilage composition. The expected  
450 sugars were detected, mostly rhamnose and galacturonic acid (GalUA) derived from  
451 rhamnogalacturonans type I (RG I) - the major pectin of the *Arabidopsis* seed mucilage  
452 (Macquet et al., 2007; Arsovsy, 2009) - and low amounts of other neutral and acidic sugars,  
453 derived from RGI-s side chains (Supplementary Fig. 8C). When analysed individually, these  
454 sugars showed no statistically significant variations among genotypes. However, examination  
455 of compositional profiles by multivariate analysis suggested genetic variation in the relative  
456 abundance of backbone sugars (Rhm and GalUA) and some side-chain sugars (Xyl and Gal),  
457 leading us to compare their ratios across the full spectrum of lines (Fig. 9D). This revealed  
458 dramatically increased GalUA/Gal ratios in *er erf1*, *er erf2* and *er erf1/seg erf2* mucilage  
459 compared to WT and other lines ( $P=0.027$ ), and a trend for higher rhamnose to xylose ratios  
460 in mutant mucilage other than *er erf1 erf2*, especially in *er erf1* and *er erf1/seg erf2* mucilage  
461 ( $P=0.08$ ). These results suggest that the ERf plays a role in the control of mucilage  
462 composition and architecture *via* interactions with the mechanisms controlling the abundance  
463 of carboxyl sites - i.e. of potential sites for pectin cross-linking - and perhaps also pectin  
464 branching. Moreover, they indicate a link between such a role and the ERf function in the  
465 regulation of seed germination.

466 To test this and probe causality, we took an indirect, holistic approach, and compared the  
467 germination kinetics of intact seeds and demucilaged seeds, deprived of the shell of loosely  
468 adherent mucilage extruded during imbibition. Demucilaged seeds systematically germinated  
469 more slowly than intact seeds on salt-free media (Fig. 9E), as is common. Under saline  
470 conditions, this was also the case for WT, *erl1*, *erl2* and *erl1 erl2* seeds but, strikingly, in *er*  
471 *erl1*, *er erl2* and *er erl1/seg erl2* seeds, mucilage removal had the opposite effect:  
472 germination delay behind WT seeds was reduced, with radicle protrusion lagging by 23 h, 13  
473 h and 39 h behind WT, respectively, instead of 68 h, 39 h, and 153 h, respectively, for intact  
474 seeds (Fig. 9E). This reflected faster progression from testa rupture to endosperm rupture.  
475 These data demonstrate a critical role of the seed water soluble mucilage in mediating the  
476 salinity-dependent function of the ERF in controlling the completion of seed germination.

477 Although appearing as distinct layers upon imbibition, mucilage and cell walls are tightly  
478 bound. The suberised seed coat and underlying endosperm constitute a mechanically strong  
479 barrier that needs to be weakened to enable radicle emergence. The micropylar endosperm  
480 that surrounds the radicle tip is thought to be the major source of mechanical resistance to  
481 radicle protrusion (Linkies et al., 2009; Dekkers et al., 2013). Endosperm weakening is  
482 effected by cell wall-modifying enzymes, in interaction with ROS and hormonal signals from  
483 the embryo, GA especially (Finch-Savage and Leubner-Metzger 2006; Muller et al., 2006;  
484 Penfield et al., 2006). We thus hypothesised that the importance of the mucilage and seed  
485 coat in mediating delayed or arrested germination in the *er*, *er erl1*, *er erl2* and *er erl1/seg erl2*  
486 mutants on saline media, could in part be related to ERF-dependent differences in endosperm  
487 and seed coat mechanical properties. The *Arabidopsis* seed is too small for direct  
488 measurements of testa and endosperm rupture forces, as is possible in other species (Linkies  
489 et al., 2009), leading us to instead examine the expression of the *Arabidopsis TOUCH (TCH)*  
490 gene *TCH3*, which encodes a calmodulin-like protein and is greatly up-regulated in response  
491 to a range of mechanical signals in other tissues (Braam and Davis, 1990). Comparison of  
492 *TCH3* expression in WT and *er erl1/seg erl2* seeds (Fig. 9F) showed the presence of  
493 transcripts in dry seeds, at similar, low levels. Imbibition triggered de novo *TCH3*  
494 transcription on 150 mM NaCl media in both WT and *erf* mutant seeds, consistent with the  
495 known role of calcium in salinity signalling (Munns and Tester, 2008). Remarkably, that  
496 induction was significantly enhanced in *er erl1/seg erl2* seeds, and was transient, preceding  
497 testa and then disappearing. These data are suggestive of enhanced mechanical constraint  
498 imposed on *er erl1/seg erl2* than WT embryos before endosperm rupture. On control media,



499 de novo *TCH3* transcription did not occur before the final phase of germination phase; again  
500 it was enhanced in *er erl1/seg erl2* seeds compared to WT.

501

502

### 503 **Discussion**

504 Plant propagation, dispersion, ability to compete and yield all ultimately rely on viable seeds  
505 being produced and able to germinate at a time favourable to autotrophic growth and  
506 establishment of a new seedling. During development on the mother plant, following  
507 embryogenesis and acquisition of dormancy during maturation, the seed undergoes intense  
508 dehydration and the embryo becomes quiescent. Germination brings that embryo from a  
509 highly resilient to a highly vulnerable state, in direct contact with the outer environment, and  
510 to a point of no return. How seeds monitor conditions in their immediate surrounding to  
511 optimise the timing of germination initiation and its completion is mostly unknown. In this  
512 study, we show that the *Arabidopsis* ERECTA family acts to control the timing of seed  
513 germination according to external salinity and osmotic levels (Fig. 1; Fig. 4). Loss of *ER*, or  
514 of *ER* and its paralogs slows down germination or even prevents it under increasing salinity  
515 and osmotic stress, while not compromising seed viability, as germination readily resumes  
516 upon the return of favourable conditions (Fig. 6). The ERF-mediated sensing of changing  
517 salinity levels involves interactions with the ABA-GA signalling network of germination and  
518 dormancy, and is primarily controlled by the embryo surrounding endosperm and testa, with  
519 a critical role of the latter and its mucilage (Fig. 8; Fig. 9). These findings reveal unsuspected  
520 regulators of the interactions between the seed and its environment, and a novel function of  
521 the three ERF receptor-like kinases in controlling these interactions, and cryptic genetic  
522 variation in seed germination.

523

### 524 **The *ERECTA* gene family regulates seed germination on salt, via maternally controlled** 525 **effects on seed coat enlargement and mucilage properties**

526 The seed coat derives from the maternal ovule integuments which, following fertilisation,  
527 expand and undergo profound developmental and biochemical transformations, resulting in a  
528 highly differentiated, impermeable and mechanically strong tissue (Beekmann et al. 2000;  
529 Western et al. 2000). The mucilage is secreted and deposited in its outer, epidermal layer,  
530 concomitantly with embryo morphogenesis, following cessation of integument expansion

531 (reviewed by Haughn et al., 2012; North et al., 2014). Its physiological roles have remained  
532 elusive. Apart from anchoring the imbibed seed to its physical substrate, the gelatinous  
533 mucilage is generally thought to facilitate germination, especially under osmotic stress,  
534 through sequestering water and keeping the seed hydrated (Penfield et al., 2001; Arsovski et  
535 al., 2010; Yang et al., 2010). However, several studies suggest mucilage can also inhibit  
536 germination under unsuitable conditions, perhaps through limiting water and oxygen  
537 diffusion to the embryo (Western et al., 2012 and references herein). This study sheds some  
538 light on the ill-understood genetic control of the context-dependent role of the seed mucilage  
539 on germination, revealing that the ERf are key players. We observed a promoting role of the  
540 seed mucilage on germination speed in WT, *erl1*, *erl2* and *erl1 erl2* seeds, under both saline  
541 and non-saline conditions (Fig. 9E). However, in the salt-hypersensitive *er erl1*, *er erl2*, and  
542 *er erl1/seg erl2* seeds, that role was only expressed under control conditions. Under salinity,  
543 it was lost (*er erl1*, *er erl2* seeds) or even reversed (triple mutant). These results link, for the  
544 first time, the seed mucilage and the ER pathway in the germination response to  
545 environmental variations at the seed surface.

546 How could the ERf control salinity-dependent properties of the seed mucilage regulating the  
547 germination process? The seed mucilage is alike a pectin-rich secondary cell wall (Haughn  
548 and Western, 2012). The degrees of pectin branching and cross-linking, with calcium ions in  
549 particular, are known to greatly influence pectins' hydrophilicity, adsorption to cellulose  
550 microfibrils and partitioning between loose outer mucilage and adherent inner mucilage  
551 (Willats et al., 2006; North et al., 2014; Ralet et al., 2016). It is also well-established that the  
552 small monovalent  $\text{Na}^+$  ions have the capacity to easily displace the larger divalent  $\text{Ca}^{2+}$  ions  
553 that cross-link carboxyl residues of adjacent pectin molecules (Fry, 1986; Willats et al., 2006;  
554 Ghanem et al., 2010), thus leading to a looser, more hydrophilic mucilage upon imbibition  
555 with saline than salt-free water, and also more abundant (Fig. 9C; Ghanem et al. 2010) due to  
556 increased release of pectin molecules from the cellular matrix. We propose that the  
557 enrichment of *er erl1*, *er erl2*, and *er erl1/seg erl2* seed mucilage in uronic acids - hence  
558 potential sites for  $\text{Ca}^{+2}$ .  $\text{Na}^+$  exchange- and trend to reduced xylose content relative to  
559 backbone rhamnose suggestive of altered branching (Fig.9D), thus have the potential to  
560 significantly modify a) the seed mucilage and sub-tending wall swelling properties and  
561 changes in osmotic potential, conformation and rigidity upon imbibition with a saline or high  
562 osmolarity solution (Willats et al., 2006; Ghanem et al., 2010; Ralet et al., 2016); b) the  
563 rearrangement of mucilage and wall components as pectin molecules get released

564 (Rautengarten et al., 2008); and c) perhaps also free Ca<sup>2+</sup> influx to the adjoining inner  
565 endosperm and embryo; so d) as a whole, the chemical and mechanical interactions between  
566 the seed environment, seed coat and interior compartments.

567 The *erf* seeds with enhanced sensitivity to salt and hyperosmotic stress during germination  
568 are also smaller (Fig. 8A). *Arabidopsis* seed size is controlled by complex interactions of  
569 zygotic and maternal factors, and seed integuments-endosperm inter-signalling (Garcia et al.,  
570 2003; Luo et al., 2005; Day et al., 2008; Dilkes et al., 2008; Zhou et al., 2009; Wang et al.,  
571 2010; Jiang et al., 2013). Here, our reciprocal crosses show that variation in final seed size  
572 among *erf* mutants and WT is of maternal origin (Fig. 8D). Final seed size is reached early in  
573 seed development, through a first phase of active cell proliferation triggered by fertilisation,  
574 in both the integuments and the endosperm, followed by a period of mostly cell expansion.  
575 Expansion ceases five to six days post-anthesis, concomitantly with the endosperm switching  
576 from syncytial development to cellularisation (Garcia et al. 2005), and the start of starch and  
577 mucilage synthesis. Variation in maximum cell elongation appears to be the main driver of  
578 maternal variations in final seed cavity and seed size as observed here, through a so-called  
579 ‘compensatory’ growth mechanism (Garcia 2005). The *ERECTA* gene has been implicated in  
580 such compensatory mechanism between cell number and cell size in leaves (Ferjani et al.  
581 2007), and comparison of the seed epidermis of the *Ler* and *Columbia* accessions suggests  
582 “compensation” may take place in the seed integuments too (Garcia et al. 2005).  
583 Interestingly, the progression and completion of integument growth during ovule  
584 development was previously reported to require a minimum ERF signalling (Pillitteri et al.,  
585 2007). That requirement was ascribed to a role of the ERf in cellular proliferative activity  
586 through interactions with cell cycle regulators. However, the final cell number in the mature  
587 ovule was unchanged making it unlikely that the reduced seed size cavity and less expanded  
588 seed coat observed here in the *er*, *er erl1*, *er erl2* and *er erl1/seg erl2* seeds (Fig. 8A) are pre-  
589 determined prior to fertilisation. Moreover, no ovule integument growth defect was reported  
590 in ovule integuments other than *er erl1 erl2*+/- . Here, loss of *ER* alone was sufficient to cause  
591 reduced seed size, and further loss of *ERL1* or *ERL2* had only a small or no significant  
592 additional inhibitory effect; and, when occurring in an *ER* background, loss of *ERL1* and  
593 *ERL2* instead caused an increase of seed size beyond that in WT (Fig. 8A). This supports the  
594 idea that partly different mechanisms are involve in ERf-mediated control of seed size and  
595 germination sensitivity to salinity. Given the role of the ERf in the composition of the  
596 mucilage (Fig. 9D) and the reported increases in uronic acids and cellulose in leaves of two

597 *er* mutants (Sánchez-Rodríguez et al., 2009), a tentativing hypothesis is that the ERF may  
598 regulate cell wall formation and assembly, not only during mucilage and secondary cell wall  
599 deposition, but also prior to that, during seed coat enlargement and formation of the seed  
600 cavity. That proposition would provide a unifying explanation for a link between the ERF-  
601 mediated regulation of seed size, salinity-dependent mucilage properties and germination  
602 speed, as uncovered by this study.

603

#### 604 **ERf-mediated salt signalling in germinating seeds involves a complex regulatory** 605 **network**

606 The *Arabidopsis* seed coat is in immediate contact with the one-cell thin endosperm, itself in  
607 direct contact with the embryo. Although less well-documented than in humans, there are  
608 demonstrated cases of plant membrane receptors or mechano-sensitive channels' ability to  
609 monitor cell wall integrity, membrane and wall physical interactions, deformation and  
610 rheology (Hamann et al., 2012; Monshausen and Haswell, 2013; Hamilton et al., 2015;  
611 Haswell and Verslues, 2015). The ERF proteins belong to XIII Leucine-Rich Repeats  
612 Receptor-Kinases. Most interestingly, among its other four members, that class includes FEI1  
613 and FEI2 (Shiu et al., 2004) which were recently shown to interact with an arabinogalactan  
614 protein in mediating a salt-overly sensitive root and seed adherence mucilage phenotype  
615 (Harpaz-Saad et al., 2011; Griffiths et al., 2014). In addition, based on the analysis of disease  
616 resistance in two *er* mutants, the ER protein has been suspected of interacting with wall-  
617 associated kinases (WAKs) during defence against some pathogens, via effects on cell wall  
618 composition (Sánchez-Rodríguez et al., 2009). WAKs are known to be tightly bound to  
619 pectins, galacturonic acids especially, in a Ca<sup>2+</sup>-dependent manner (Wagner and Kohorn,  
620 2001; Decreux and Messiaen, 2005), and several WAK/WAK-Like proteins have been  
621 implicated in responses to mineral ions, including Na<sup>+</sup> (Sivaguru et al., 2003; Hou et al.,  
622 2005; de Lorenzo et al., 2009) and to osmotic stress (SOS6/AtCSLD5, Zhu et al., 2010),  
623 through unknown mechanisms. ERF-mediated modifications of mucilage and bound cell  
624 walls may thus be perceived and signalled to the seed interior by the *ERf* proteins themselves  
625 either directly or through modified interactions with cell wall-associated proteins, osmo-  
626 sensors or mechano-sensors (Dekkers, et al. 2013; Nonogaki, 2014). The induction of *TCH3*  
627 in the *er erl1/seg erl2* seed supports this hypothesis.

628

629 It will be intriguing to unravel the downstream cascade. The salt-hypersensitive *er erl1*, *er*  
630 *erl2*, *er erl1/seg erl2* seeds show enhanced sensitivity to exogenous ABA, and enhanced  
631 upregulation of *ABI3*, *ABI5* and *RGL2* under saline conditions compared to wild type (Fig. 7).  
632 *ABI3*, *ABI5*, *RGL2* are emerging as important mediators of salinity and osmotic stress and  
633 controllers of ABA-GA homeostasis in imbibed seeds. ABA synthesised in the endosperm  
634 and released to the embryo activates the abundance and activity of the *ABI3* and *ABI5*  
635 transcription factors, and triggers an auto-feedback loop that maintains *RGL2* mRNA levels  
636 high and represses cell wall modifying enzymes (Giraudat et al., 1992; Finkelstein and  
637 Lynch, 2000; Lee et al., 2002; Lopez-Molina et al., 2001 & 2002; Piskurewicz et al., 2008;  
638 Piskurewicz et al., 2009; Lee et al. 2010; Kang et al. 2015). Our data indicate that the ERF-  
639 mediated regulation of germination sensitivity to changing salinity levels interferes with that  
640 signalling loop.

641 A well-documented adaptive mechanism seeds have evolved to withstand unfavourable  
642 conditions such as high temperatures, cold, osmotic or salinity stress, and maintain embryo  
643 viability is secondary dormancy (Bewley, 1997) - a reversible, transient quiescent state  
644 induced and released in adaptation to fluctuating environmental conditions (Koorneef et al.,  
645 1982; Giraudat et al., 1992; Léon-Kloosterziel et al., 1996; Finch-Savage and Leubner-  
646 Metzger, 2006; Lefebvre et al., 2006; Weitbrecht et al., 2011; Ibarra et al., 2016). *ABI3*,  
647 *ABI5* and *RGL2* are prominent players in the regulation of secondary dormancy and  
648 increased sensitivity to ABA, upregulation of *ABI3*, *ABI5* and *RGL2* have been reported  
649 during early growth arrest in newly germinated *Arabidopsis* seedlings under water stress and  
650 salinity (Lopez-Molina et al., 2001; 2002). Here we find that loss of the ERF sensitises seed  
651 germination to salinity and frequently arrests it, and that this arrest is reversible, with  
652 germination readily resuming upon stress release and progressing to completion as fast as in  
653 seeds never exposed to stress (Fig. 6). Moreover, arrested seeds show an upregulation of the  
654 *DOG1* gene (Fig. 7), a major controller of coat- and endosperm-mediated dormancy as takes  
655 place in the *Arabidopsis* seed. *DOG1* interacts with GA and ABA signalling, upstream of  
656 *ABI5*, and appears to be an agent of environmental adaptation of germination among  
657 *Arabidopsis* accessions (Graeber, 2014; Dekkers et al., 2013; Née et al., 2017; Nishimura et  
658 al. 2018). Taken as a whole, these observations suggest that the ERF interacts with the  
659 molecular controls of secondary dormancy to appropriately cue and pace germination. While  
660 promotion of fast germination under stress may be seen as desirable, it also exposes the  
661 newly germinated seedling to risks of death should adverse conditions persist or worsen as

662 the embryo becomes directly exposed to the external environment with all its reserves already  
663 burnt. In such circumstances, germination delay or arrest could then be a useful protective  
664 strategy to maximise chances of survival through temporarily safeguarding the embryo  
665 against such a fate. In that light, the environment-dependent function of the ERF on  
666 germination speed would perform a vital adaptive function. Interestingly, only under  
667 extremely severe stress (~200 mM NaCl) does the loss of *ER* and *ERL1* and/or *ERL2* cause  
668 germination arrest in absolutely all seeds within a cohort. Under milder stress, some seeds do  
669 germinate at the same time as WT, others with increasing delay, and others are arrested until  
670 stress release, a mixed response that may balance risks of death and loss of fitness or ability  
671 to complete the life cycle in time.

672

673 In conclusion, plants must be endowed with a “surveillance” system for the perception and  
674 transduction of external environmental cues to internal compartments, and their integration  
675 with developmental pathways. This study illuminates a key role of the ERF in that elusive  
676 integrative network in seeds, to control the most critical decision in the cycle of life, when to  
677 initiate a new plant. Given the evolutionary conservation of the ERECTA receptor-kinases  
678 across a broad range of plant species, and the emerging intense interest in mucilage as a  
679 model for cell wall studies and an important adaptive feature, our findings open new avenues  
680 for unravelling the mechanisms seeds have evolved to control germination and tune it to local  
681 conditions for maximising chances of survival.

682

683

#### 684 **Gene accession numbers**

685 *AtER* (At2g26330), *AtERL1* (At5g62230), *AtERL2* (At5g07180), (*At4g37490*), *AtPDF2*  
686 (*At1g13320*), *bHLH* (At4g38070), *PPR* (At5g55840)

687

#### 688 **Supplementary Data**

689 **Supplementary Figure S1.** NaCl-dependent effects of reduced ERF signaling on the time  
690 course of seed germination.

691 **Supplementary Figure S2.** Loss of *ER* alone or in combination with *ERL1* and *ERL2*  
692 sensitises seed germination to salinity in a dose-dependent manner.

693 **Supplementary Figure S3.** ERF-dependent sensitivity of seed germination to NaCl in an  
694 independent set of *erf* single, double and triple knock-out mutants.

695 **Supplementary Figure S4.** *ERf* promoter activity in mature dry seeds and germinating  
696 seeds.

697 **Supplementary Figure S5.** Similar sensitivity to salinity stress of selected ABA and GA  
698 biosynthetic gene expression levels in WT and *er erl1/seg erl2* seeds.

699 **Supplementary Figure S6.** Mature *er erl1 erl2* embryos exhibit similar radicle size and  
700 patterning than WT seeds.

701 **Supplementary Figure S7.** Relative abundance of total fatty acid methyl-esters (FAMES)  
702 and relative proportions of individual species in embryos at full seed maturity.

703 **Supplementary Figure S8.** Characteristics of the seed mucilage.

704 **Supplementary Table S1.** List of genotyping and RT-qPCR primers.

---

705

## 706 **Acknowledgments**

707 We thank Josephine Ginty and Kefan Peng for assistance with seed permeability assays and  
708 quantitative RT-PCR, respectively; Richard Phillips for help with measurements of seed ion  
709 contents; Guillaume Tcherkez for discussions on metabolites multivariate analysis; Keiko  
710 Torii for seeds of *proERf:GUS* reporter lines; the Nottingham Arabidopsis Stock Centre and  
711 SALK-Institute for mutant seeds; the Australian National University for funding.

712

## 713 **References**

- 714 Alonso, J. M., Stepanova, A. N., Leisse, T. J., Kim, C. J., Chen, H., Shinn, P., et al. (2003).  
715 Genome-wide insertional mutagenesis of *Arabidopsis thaliana*. *Science*, 301:5633, 653–  
716 657.
- 717 Alvarado, V., Bradford, K. J. (2002). A hydrothermal time model explains the cardinal  
718 temperatures for seed germination. *Plant, Cell and Environment*, 25, 1061-1069.
- 719 Arsovski, A.A., Popma, T.M., Haughn, G.W., Carpita, N.C., McCann, M.C., Western, T.L.  
720 (2009). AtBXL 1 Encodes a bifunctional bD-Xylosidase / a-L-Arabinofuranosidase



- 721 required for pectic arabinan modification in *Arabidopsis* mucilage secretory cells. *Plant*  
722 *Physiology*, 150(3), 1219-1234.
- 723 Arsovski, A. A., Haughn, G. W., Western, T. L. (2010). Seed coat mucilage cells of  
724 *Arabidopsis thaliana* as a model for plant cell wall research. *Plant Signaling and*  
725 *Behavior*, 5:7, 796–801.
- 726 Bailly, C. (2004). Active oxygen species and antioxidants in seed biology. *Seed Science*  
727 *Research*, 14:2, 93–107.
- 728 Baskin, J. M., Baskin, C. C. (2004). A classification system for seed dormancy. *Seed Science*  
729 *Research*, 14:1, 1–16.
- 730 Becraft, P. W. (2002). Receptor kinase signaling in plant development. *Annual Review of*  
731 *Cell and Developmental Biology*, 18:1, 163-192.
- 732 Beeckman, T., De Rycke, R., Viane, R., Inzé, D. (2000). Histological study of seed coat  
733 development in *Arabidopsis thaliana*. *Journal of Plant Research*, 113:1110, 139–148.
- 734 Bemis, S. M., Lee, J. S., Shpak, E. D., Torii, K. U. (2013). Regulation of floral patterning and  
735 organ identity by *Arabidopsis* ERECTA-family receptor kinase genes. *Journal of*  
736 *Experimental Botany*, 64:17, 5323–5333.
- 737 Bewley, J. D. (1997). Seed germination and dormancy. *The Plant Cell*, 9(7), 1055–1066.
- 738 Bewley, J. D., Bradford, K., Hilhorst, H. (2013). Seeds: physiology of development,  
739 germination and dormancy - J.D. Bewley, K. Bradford, H. Hilhorst, H. Nonogaki eds.  
740 Springer. Chapter 4.
- 741 Boyer, J.S. (1982). Plant productivity and environment. *Science*, 218, 443-448.
- 742 Braam, J., Davis, R.W. (1990). Rain-, wind-, and touch-induced expression of calmodulin  
743 and calmodulin-related genes in *Arabidopsis*. *Cell*, 60:3, 357-364.
- 744 Bradford, K.J. (1990). A water relations analysis of seed germination rates. *Plant Physiology*,  
745 94:2, 840-849.
- 746 Bundy, M. G. R., Thompson, O. A., Sieger, M. T., Shpak, E. D. (2012). Patterns of cell  
747 division, cell differentiation and cell elongation in epidermis and cortex of *Arabidopsis*  
748 pedicels in the wild type and in *erecta*. *PLoS ONE*, 7:9, e46262.
- 749 Clerkx, E. J. M., El-Lithy, M. E., Vierling, E., Ruys, G. J., Vries, H. B.-D., Steven P.C.  
750 Groot, et al. (2004). Analysis of natural allelic variation of *arabidopsis* seed germination  
751 and seed longevity traits between the accessions Landsberg *erecta* and Shakhara, using a  
752 new recombinant inbred line population. *Plant Physiology*, 135, 432-443.
- 753 Day, R.C., Herridge, R.P., Ambrose, B.A., Macknight, R.C. 2008. Transcriptome analysis of  
754 proliferating *Arabidopsis* endosperm reveals biological implications for the control of



- 755        syncytial division, cytokinin signalling, and gene expression regulation. *Plant*  
756        *Physiology*, 148, 1964–1984.
- 757        de Lorenzo, L., Merchan, F., Laporte, P., Thompson, R., Clarke, J., Sousa, C., Crespi, M.  
758        (2009). A novel plant leucine-rich repeat receptor kinase regulates the response of  
759        *Medicago truncatula* roots to salt stress. *The Plant Cell*, 21:2, 668–680.
- 760        Debeaujon, I., Koornneef, M. (2000). Gibberellin requirement for *Arabidopsis* seed  
761        germination is determined both by testa characteristics and embryonic abscisic acid. *Plant*  
762        *Physiology*, 122, 415–424.
- 763        Decreux, A., Messiaen, J. (2005). Wall-associated kinase WAK1 interacts with cell wall  
764        pectins in a calcium-induced conformation. *Plant and Cell Physiology*, 46(2), 268–278.
- 765        Dekkers, B. J. W., Pearce, S., van Bolderen-Veldkamp, R. P., Marshall, A., Widera, P.,  
766        Gilbert, J., et al. (2013). Transcriptional dynamics of two seed compartments with  
767        opposing roles in *Arabidopsis* seed germination. *Plant Physiology*, 163, 205–215.
- 768        Dekkers B.J., He H, Hanson J., Willems L.A, Jamar D.C, Cuff G, Rajjou L, Hilhorst  
769        H.W, Bentsink L. (2016). The *Arabidopsis* DELAY OF GERMINATION 1 gene affects  
770        ABSCISIC ACID INSENSITIVE 5 (ABI5) expression and genetically interacts with  
771        ABI3 during *Arabidopsis* seed development. *Plant Journal*, 85:4, 451–465.
- 772        DeRose-Wilson, L., Gaut, B. S. (2011). Mapping salinity tolerance during *Arabidopsis*  
773        *thaliana* germination and seedling growth. *PLoS ONE*, 6:8, e22832.
- 774        Dilkes, B.P., Spielman, M., Weizbauer, R., Watson, B., Burkart-Waco, D., Scott, R.J.,  
775        Comai, L. 2008. The maternally expressed WRKY transcription factor TTG2 controls  
776        lethality in interploidy crosses of *Arabidopsis*. *PLoS Biology*, 6, 2708–2720.
- 777        Donohue, K., de Casas, R. R., Burghardt, L., Kovach, K., Willis, C.G. (2010). Germination,  
778        postgermination adaptation, and species ecological ranges. *Review of Ecology*, 41:1,  
779        293–319.
- 780        Etchells, J. P., Provost, C. M., Mishra, L., Turner, S. R. (2013). WOX4 and WOX14 act  
781        downstream of the PXY receptor kinase to regulate plant vascular proliferation  
782        independently of any role in vascular organisation. *Development*, 140:10, 2224–2234.
- 783        Ferjani, A., Horiguchi, G., Yano, S., Tsukaya, H. (2007). Analysis of leaf development in  
784        *fugu* mutants of *arabidopsis* reveals three compensation modes that modulate cell  
785        expansion in determinate organs. *Plant Physiology*, 144, 988–999.
- 786        Finch-Savage, W. E., Leubner-Metzger, G. (2006). Seed dormancy and the control of  
787        germination. *The New Phytologist*, 171:3, 501–523.
- 788        Finkelstein, R. R., Lynch, T. J. (2000). The *arabidopsis* abscisic acid response gene ABI5

- 879 encodes a basic leucine zipper transcription factor. *The Plant Cell*, 12(4), 599–609.
- 890 Finkelstein, R., Reeves, W., Ariizumi, T., Steber, C. (2008). Molecular aspects of seed  
891 dormancy. *Annual Review of Plant Biology*, 59, 387–415.
- 892 Fry, S. C. (1986). Cross-linking of matrix polymers in the growing cell walls of angiosperms.  
893 *Annual Review of Plant Physiology*. 37, 165-186.
- 894 Galpaz, N., Reymond, M. (2010). Natural variation in *Arabidopsis thaliana* revealed a genetic  
895 network controlling germination under salt stress. *PLoS ONE*, 5:12, e15198.
- 896 Garcia, D., Saingery, Chambrier, P., Mayer, U., Jürgens, G., Berger, F. (2003). *Arabidopsis*  
897 *haiku* mutants reveal new controls of seed size by the endosperm. *Plant Physiology*, 131:  
898 1661–1670.
- 899 Garcia, D., Gerald, J.N.F., Berger, F. (2005). Maternal control of integument cell elongation  
900 and zygotic control of endosperm growth are coordinated to determine seed size in  
901 *Arabidopsis*. *Plant Cell*, 17, 52–60.
- 902 Ghanem, M. E., Han, R. M., Classen, B. (2010). Mucilage and polysaccharides in the  
903 halophyte plant species *Kosteletzkya virginica*: Localization and composition in relation  
904 to salt stress. *Journal of Plant Physiology*, 167, 382-392.
- 905 Giraudat, J., Hauge, B. M., Valon, C., Smalle, J., Parcy, F., Goodman, H. M. (1992).  
906 Isolation of the *Arabidopsis* *ABI3* gene by positional cloning. *The Plant Cell*, 4:10, 1251-  
907 1261.
- 908 Godiard, L., Sauviac, L., Torii, K. U., Grenon, O., Mangin, B., Grimsley, N. H., Marco, Y.  
909 (2003). *ERECTA*, an LRR receptor-like kinase protein controlling development  
910 pleiotropically affects resistance to bacterial wilt. *Plant Journal*, 36:3, 353–365.
- 911 Graeber, K., Linkies, A., Steinbrecher, T., Mummenhoff, K., Tarkowská, D., Turečková, V.,  
912 et al. (2014). *DELAY OF GERMINATION 1* mediates a conserved coat-dormancy  
913 mechanism for the temperature- and gibberellin-dependent control of seed germination.  
914 *Proceedings of the National Academy of Sciences of the United States of America*,  
915 E3575-3580.
- 916 Griffiths, J. S., Tsai, A. Y.-L., Xue, H., Voiniciuc, C., Sola, K., Seifert, G. J., et al. (2014).  
917 *SALT-OVERLY SENSITIVE5* mediates *Arabidopsis* seed coat mucilage adherence and  
918 organization through pectins. *Plant Physiology*, 165:3, 991–1004.
- 919 Hamann, T. (2012). Plant cell wall integrity maintenance as an essential component of biotic  
920 stress response mechanisms. *Frontiers in Plant Science*, 3, 77.
- 921 Hamilton, E. S., Schlegel, A. M., Haswell, E. S. (2015). United in diversity:  
922 mechanosensitive ion channels in plants. *Annual Review of Plant Biology*, 66, 113–137.

- 823 Hanke, D. E., Northcote, D. H. (1975). Molecular visualization of pectin and DNA by  
824 ruthenium red. *Biopolymers*, 14:1, 1–17.
- 825 Harpaz-Saad, S., McFarlane, H. E., Xu, S., Divi, U. K., Forward, B., Western, T. L., Kieber,  
826 J. J. (2011). Cellulose synthesis via the FEI2 RLK/SOS5 pathway and cellulose synthase  
827 5 is required for the structure of seed coat mucilage in *Arabidopsis*. *The Plant Journal*,  
828 68:6, 941–953.
- 829 Haswell, E. S., Verslues, P. E. (2015). The ongoing search for the molecular basis of plant  
830 osmosensing. *The Journal of General Physiology*, 145:5, 389–394.
- 831 Haughn, G. W., Western, T. L. (2012). *Arabidopsis* seed coat mucilage is a specialized cell  
832 wall that can be used as a model for genetic analysis of plant cell wall structure and  
833 function. *Frontiers in Plant Science*, 3(64).
- 834 Holdsworth, M. J., Bentsink, L., Soppe, W. J. J. (2008). Molecular networks regulating  
835 *Arabidopsis* seed maturation, after-ripening, dormancy and germination. *New*  
836 *Phytologist*, 179:1, 33–54.
- 837 Hou, X. W., Tong, H. Y., Selby, J., DeWitt, J., Peng, X. X., He, Z. H. (2005). Involvement of  
838 a cell wall-associated kinase, WAKL4, in *Arabidopsis* mineral responses. *Plant*  
839 *Physiology*, 139:4, 1704–1716.
- 840 Ibarra, S.E., Tognacca, R.S., Dave, A., Graham, I.A., Sanchez, R. A., Botto, J. F. Molecular  
841 mechanisms underlying the entrance in secondary dormancy of *Arabidopsis* seeds, *Plant*  
842 *Cell Environment*, 39, 213-221
- 843 Ingram, G., Gutierrez-Marcos, J. (2015). Peptide signalling during angiosperm seed  
844 development. *Journal of Experimental Botany*, 66:17, 5151–5159.
- 845 James, G.O., Hocart, C.H., Hillier, W., Chen, H., Kordbacheh, F., Price, G. D., Djordjevic,  
846 M. A. (2011). Fatty acid profiling of *Chlamydomonas reinhardtii* under nitrogen  
847 deprivation. *Bioresource Technology*, 102:3, 3343-3351.
- 848 Jordá, L., Sopena-Torres, S., Escudero, V., Nuñez-Corcuera, B., Delgado-Cerezo, M., Torii,  
849 K. U., Molina, A. (2016). ERECTA and BAK1 receptor like kinases interact to regulate  
850 immune responses in *Arabidopsis*. *Frontiers in Plant Science*, 7:15140, 897.
- 851 Jiang, W.B., Huang, H.Y., Hu, Y.W., Zhu, S.W., Wang, Z.Y., Lin, W.H. (2013).  
852 Brassinosteroid regulates seed size and shape in *Arabidopsis*. *Plant Physiology*, 162:4,  
853 1955-1977.
- 854 Kang, J., Yim, S., Choi, H., Kim, A., Lee, K. P., Lopez-Molina, L., et al. (2015). Abscisic  
855 acid transporters cooperate to control seed germination. *Nature Communications*, 6,  
856 8113.

- 857 Kazachkova, Y., Khan, A., Acuna, T., López-Díaz, I, Carrera, E., Khozin-Goldberg, I., Fait,  
858 A., Barak, S. (2016). Salt induces features of a dormancy-like state in seeds of *Eutrema*  
859 (*Thellungiella*) *salsugineum*, a halophytic relative of *Arabidopsis*. *Frontiers in Plant*  
860 *Science*, 7, 1071
- 861 Kim, J. B., Carpita, N. C. (1992). Changes in esterification of the uronic-acid groups of cell-  
862 wall polysaccharides during elongation of maize coleoptiles. *Plant Physiology*, 98(2),  
863 646–653.
- 864 Kim, S.G., Lee, A.K., Yoon, H.K., Park, C.M. (2008). A membrane-bound NAC  
865 transcription factor NTL8 regulates gibberellic acid-mediated salt signaling in  
866 *Arabidopsis* seed germination. *The Plant Journal*, 55:1, 77–88.
- 867 Koornneef, M., Van der Veen, J. H. I (1980). Induction and analysis of gibberellin-sensitive  
868 mutants in *Arabidopsis thaliana* (L.) Heynh. *Theoretical Applied Genetics* 58:1:257–  
869 263.
- 870 Koornneef, M., Jorna, M. L., Brinkhorst-van der Swan, D. L., Karszen, C. M. (1982). The  
871 isolation of abscisic acid (ABA) deficient mutants by selection of induced revertants in  
872 non-germinating gibberellin sensitive lines of *Arabidopsis thaliana* (L.) heyneh.  
873 *Theoretical and Applied Genetics*, 61:4, 385–393.
- 874 Kucera, B., Cohn, M. A., Leubner-Metzger, G. (2005). Plant hormone interactions during  
875 seed dormancy release and germination. *Seed Science Research*, 15:4, 281–307.
- 876 Lease, K. A., Lau, N. Y., Schuster, R. A., Torii, K. U., Walker, J. C. (2001). Receptor  
877 serine/threonine protein kinases in signalling: analysis of the ERECTA receptor-like  
878 kinase of *Arabidopsis thaliana*. *The New Phytologist*, 151:1, 133–143.
- 879 Lee, K. P., Piskurewicz, U., Turečková, V., Strnad, M., Lopez-Molina, L. (2010). A seed coat  
880 bedding assay shows that RGL2-dependent release of abscisic acid by the endosperm  
881 controls embryo growth in *Arabidopsis* dormant seeds. *Proceedings of the National*  
882 *Academy of Sciences*, 107:(44), 19108–19113.
- 883 Lee, S., Cheng, H., King, K. E., Wang, W., He, Y., Hussain, A., et al. (2002). Gibberellin  
884 regulates *Arabidopsis* seed germination via RGL2, a GAI/RGA-like gene whose  
885 expression is up-regulated following imbibition. *Genes and Development*, 16:5, 646–658.
- 886 Lefebvre, V., North, H., Frey, A., Sotta, B., Seo, M., Okamoto, M., et al. (2006). Functional  
887 analysis of *Arabidopsis* NCED6 and NCED9 genes indicates that ABA synthesized in the  
888 endosperm is involved in the induction of seed dormancy. *Plant Journal*, 45:3, 309–319.
- 889 Léon-Kloosterziel, K. M., van de Bunt, G. A., Zeevaart, J., Koornneef, M. (1996).  
890 *Arabidopsis* mutants with a reduced seed dormancy. *Plant Physiology*, 110:1, 233–240.

- 891 Linkies, A., Müller, K., Morris, K., Turečková, V., Wenk, M., Cadman, C. S. C., et al.  
892 (2009). Ethylene interacts with abscisic acid to regulate endosperm rupture during  
893 germination: a comparative approach using *Lepidium sativum* and *Arabidopsis thaliana*.  
894 *The Plant Cell*, 21:12, 3803–3822.
- 895 Lionen, J., Schwender, J. (2009). Analysis of metabolic flux phenotypes for two *Arabidopsis*  
896 mutants with severe impairment in seed storage lipid synthesis. *Plant Physiology* 151,  
897 1617-1634.
- 898 Liu, P.-P., Koizuka, N., Homrichhausen, T. M., Hewitt, J. R., Martin, R. C., Nonogaki, H.  
899 (2005). Large-scale screening of *Arabidopsis* enhancer-trap lines for seed germination-  
900 associated genes. *Plant Journal*, 41:6, 936–944.
- 901 Liu, X. , Hu, P., Huang, M., Tang, Y., Li, Y. , Li, L., Hou, X. (2016). The NF-YC–RGL2  
902 module integrates GA and ABA signalling to regulate seed germination in *Arabidopsis*.  
903 *Nature Communications*, 7, 12768.
- 904 Llorente, F., Alonso-Blanco, C., Sánchez-Rodríguez, C., Jordá, L., Molina, A. (2005).  
905 ERECTA receptor-like kinase and heterotrimeric G protein from *Arabidopsis* are  
906 required for resistance to the necrotrophic fungus *Plectosphaerella cucumerina*. *The Plant*  
907 *Journal*, 43:2, 165–180.
- 908 Lopez-Molina, L., Mongrand, S., Chua, N. H. (2001). A postgermination developmental  
909 arrest checkpoint is mediated by abscisic acid and requires the ABI5 transcription factor  
910 in *Arabidopsis*. *Proceedings of the National Academy of Sciences of the United States of*  
911 *America*, 98:8, 4782–4787.
- 912 Lopez-Molina, L., Mongrand, S., McLachlin, D. T., Chait, B. T., Chua, N.H. (2002). ABI5  
913 acts downstream of ABI3 to execute an ABA-dependent growth arrest during  
914 germination. *Plant Journal*, 32:3, 317–328.
- 915 Luo, M., Dennis, E.S., Berger, F., Peacock, W.J., Chaudhury, A. 2005. MINISEED3  
916 (MINI3). a WRKY family gene and HAIKU2 (IKU2), a leucine-rich repeat (LRR)  
917 kinase gene are regulators of seed size in *Arabidopsis*. *Proceedings of the National*  
918 *Academy of Science USA* 102, 17531–17536.
- 919 Macquet, A., Ralet, M.-C., Kronenberger, J., Marion-Poll, A., North, H. M. (2007). In situ,  
920 chemical and macromolecular study of the composition of *Arabidopsis thaliana* seed coat  
921 mucilage. *Plant Cell Physiology*, 48:7, 984-999.
- 922 Masle, J., Gilmore, S. R., Farquhar, G. D. (2005). The ERECTA gene regulates plant  
923 transpiration efficiency in *Arabidopsis*. *Nature*, 436:7052, 866–870.
- 924 Molina, I., Ohlrogge, J. B., Pollard, M. (2008). Deposition and localization of lipid polyester

- 925 in developing seeds of *Brassica napus* and *Arabidopsis thaliana*. *Plant Journal*, 53: 3,  
926 437–449.
- 927 Monshausen, G. B., Haswell, E. S. (2013). A force of nature: molecular mechanisms of  
928 mechanoperception in plants. *Journal of Experimental Botany*, 64:15, 4663–4680.
- 929 Müller, K., Linkies, A., Vreeburg, R. A. M., Fry, S. C., Krieger-Liszkay, A., Leubner-  
930 Metzger, G. (2009). In vivo cell wall loosening by hydroxyl radicals during cress seed  
931 germination and elongation growth. *Plant Physiology*, 150:4, 1855–1865.
- 932 Müller, K., Tintelnot, S., Leubner-Metzger, G. (2006). Endosperm-limited Brassicaceae seed  
933 germination: abscisic acid inhibits embryo-induced endosperm weakening of *Lepidium*  
934 *sativum* (cress) and endosperm rupture of cress and *Arabidopsis thaliana*. *Plant and Cell*  
935 *Physiology*, 47:7, 864–877.
- 936 Munns, R., Tester, M. (2008). Mechanisms of salinity tolerance. *Annual Review of Plant*  
937 *Biology*, 59:1, 651–681.
- 938 Née, G., Kramer, K., Nakabayashi, K., Yuan, B., Xiang, Y., Miatton, E., Finkemeier, I.,  
939 Soppe, W.J.J. (2017). DELAY OF GERMINATION1 requires PP2C phosphatases of  
940 the ABA signalling pathway to control seed dormancy. *Nature Communications*, 8, 72.
- 941 Nishimura, N., Tsuchiya, W., Moresco, J.J., Hayashi, Y., Satoh, K., Kaiwa, N., Irisa, T.,  
942 Kinoshita, T., Schroeder, J.I., Tate, J.R., Hirayama, T., Yamazaki, T. (2018). Control  
943 of seed dormancy and germination by DOG1-AHG1 PP2C phosphatase complex via  
944 binding to heme. *Nature Communications*, 9, 2132.
- 945 Nonogaki, H. (2014). Seed germination - emerging mechanisms and new hypotheses.  
946 *Frontiers in Plant Science*, 5, 233.
- 947 North, H. M., Berger, A., Saez-Aguayo, S., Ralet, M.-C. (2014). Understanding  
948 polysaccharide production and properties using seed coat mutants: future perspectives for  
949 the exploitation of natural variants. *Annals of Botany*, 114:6, 1251–1263.
- 950 Osakabe, Y., Yamaguchi-Shinozaki, K., Shinozaki, K., Tran, L. S. P. (2013). Sensing the  
951 environment: key roles of membrane-localized kinases in plant perception and response  
952 to abiotic stress. *Journal of Experimental Botany*, 64:(2, 445–458.
- 953 Penfield, S., Meissner, R. C., Shoue, D. A., Carpita, N. C., Bevan, M. W. (2001). MYB61 is  
954 required for mucilage deposition and extrusion in the *Arabidopsis* seed coat. *The Plant*  
955 *Cell*, 13, 2777–2791.
- 956 Penfield, S.P., Rylott E.L., Gilday, A.D., Graham S., Larson, T.R., Graham, I.A. (2004).  
957 Reserve mobilisation in the *Arabidopsis* endosperm fuels hypocotyl elongation in the  
958 dark, is independent of abscisic acid, and requires phosphoenolpyruvate carboxykinase1.



- 959 The Plant Cell, 16, 2705-2718.
- 960 Penfield, S., Li, Y., Gaday, A.D., Graham, S., Graham, I.A.(2006) Arabidopsis ABA  
961 INSENSITIVE 4 regulates lipid mobilisation in the embryo and reveals repression of  
962 seed germination by the endosperm. The plant Cell, 18, 1887-1899.
- 963 Peng, L. C., Hocart, C. H., Redmond, J. W., Williamson, R. E. (2000). Fractionation of  
964 carbohydrates in Arabidopsis root cell walls shows that three radial swelling loci are  
965 specifically involved in cellulose production. Planta, 211:3, 406–414.
- 966 Pettolino, F. A., Walsh, C., Fincher, G. B., Bacic, A. (2012). Determining the polysaccharide  
967 composition of plant cell walls. Nature Protocols, 7:9, 1590–1607.
- 968 Pillitteri, L. J., Bemis, S. M., Shpak, E. D., Torii, K. U. (2007). Haploinsufficiency after  
969 successive loss of signaling reveals a role for ERECTA-family genes in Arabidopsis  
970 ovule development. Development, 134:17, 3099–3109.
- 971 Piskurewicz, U., Jikumaru, Y., Kinoshita, N., Nambara, E., Kamiya, Y., Lopez-Molina, L.  
972 (2008). The gibberellic acid signaling repressor RGL2 inhibits Arabidopsis seed  
973 germination by stimulating abscisic acid synthesis and ABI5 activity. The Plant Cell,  
974 20:10, 2729–2745.
- 975 Piskurewicz, U., Turečková, V., Lacombe, E., Lopez-Molina, L. (2009). Far-red light  
976 inhibits germination through DELLA-dependent stimulation of ABA synthesis and ABI3  
977 activity. The EMBO Journal, 28:15, 2259–2271.
- 978 Quesada, V., García-Martínez, S., Piqueras, P., Ponce, M. R., Micol, J. L. (2002). Genetic  
979 architecture of NaCl tolerance in Arabidopsis. Plant Physiology, 130:2, 951–963.
- 980 Rajjou, L., Duval, M., Gallardo, K., Catusse, J., Bally, J., Job, C., Job, D. (2012). Seed  
981 germination and vigor. Annual Review of Plant Biology, 63, 507–533.
- 982 Ralet, M.-C., Crépeau, M.-J., Vigouroux, J., Tran, J., Berger, A., Sallé, C., et al. (2016).  
983 Xylans provide the structural driving force for mucilage adhesion to the Arabidopsis seed  
984 coat. Plant Physiology, 171, 165-178.
- 985 Rautengarten, C., Usadel, B., Neumetzler, L. (2008). A subtilisin-like serine protease  
986 essential for mucilage release from Arabidopsis seed coats. The Plant Journal, 54, 466-  
987 480.
- 988 Ren, Z., Zheng, Z., Chinnusamy, V., Zhu, J., Cui, X., Iida, K., Zhu, J. K. (2010). RAS1, a  
989 quantitative trait locus for salt tolerance and ABA sensitivity in Arabidopsis. Proceedings  
990 of the National Academy of Sciences, 107:12, 5669–5674.

- 991 Rédei, J.P. (1992). A note on Columbia wild type and Landsberg erecta. In Methods in  
992 Arabidopsis Research. Koncz, C., Chua, N. H. and Schell, J. eds. World Scientific  
993 Publishing Co Inc.
- 994 Saez-Aguayo, S., Ralet, M.-C., Berger, A., Botran, L., Ropartz, D., Marion-Poll, A., North,  
995 H. M. (2013). PECTIN METHYLESTERASE INHIBITOR6 promotes Arabidopsis  
996 mucilage release by limiting methylesterification of homogalacturonan in seed coat  
997 epidermal cells. *The Plant Cell*, 25:1, 308–323.
- 998 Sánchez-Rodríguez, C., Estévez, J. M., Llorente, F., Hernández-Blanco, C., Jordá, L., Pagán,  
999 I., et al. (2009). The ERECTA receptor-like kinase regulates cell wall-mediated  
1000 resistance to pathogens in Arabidopsis thaliana. *Molecular Plant-Microbe Interactions* :  
1001 *MPMI*, 22:8, 953–963.
- 1002 Seo, M., Hanada, A., Kuwahara, A., Endo, A., Okamoto, M., Yamauchi, Y., et al. (2006).  
1003 Regulation of hormone metabolism in Arabidopsis seeds: phytochrome regulation of  
1004 abscisic acid metabolism and abscisic acid regulation of gibberellin metabolism. *The*  
1005 *Plant Journal*, 48:3, 354–366.
- 1006 Sessions, A., Weigel, D., Yanofsky, M. F. (1999). The Arabidopsis thaliana MERISTEM  
1007 LAYER 1 promoter specifies epidermal expression in meristems and young primordia.  
1008 *The Plant Journal*, 20:2, 259–263.
- 1009 Shen, H., Zhong, X., Zhao, F., Wang, Y., Yan, B., Li, Q., Chen, G., Mao, B., Wang, J., Li,  
1010 Y., Xiao, G., He, Y., Xiao, H., Li, J., He, Z. (2015). Overexpression of receptor-kinase  
1011 ERECTA improves thermotolerance in rice and tomato. *Nature Biotechnology*, 33, 996-  
1012 1003.
- 1013 Shiu, S.-H., Karlowski, W. M., Pan, R., Tzeng, Y.-H., Mayer, K. F. X., Li, W.-H. (2004).  
1014 Comparative analysis of the receptor-like kinase family in Arabidopsis and rice. *The*  
1015 *Plant Cell*, 16:5, 1220–1234.
- 1016 Shpak, E. D., Berthiaume, C. T., Hill, E. J., Torii, K. U. (2004). Synergistic interaction of  
1017 three ERECTA-family receptor-like kinases controls Arabidopsis organ growth and  
1018 flower development by promoting cell proliferation. *Development*, 131:7, 1491–1501.
- 1019 Shpak, E. D., McAbee, J.M., Pillitteri, L.J., Torii, K. U. (2005). Stomatal patterning and  
1020 differentiation by synergistic interactions of receptor kinases. *Science*, 309:5732, 290-  
1021 293.
- 1022 Sivaguru, M., Ezaki, B., He, Z. H., Tong, H. Y., Osawa, H., Baluska, F., et al. (2003).  
1023 Aluminum-induced gene expression and protein localization of a cell wall-associated  
1024 receptor kinase in Arabidopsis. *Plant Physiology*, 132:4, 2256–2266. Stamm, P.,



- 1025 Ravindran, P., Mohanty, B., Tan, E. L., Yu, H., Kumar, P. P. (2012). Insights into the  
1026 molecular mechanism of RGL2-mediated inhibition of seed germination in *Arabidopsis*  
1027 *thaliana*. *BMC Plant Biology*, 12.
- 1028 Steber, C. M., McCourt, P. (2001). A role for brassinosteroids in germination in *Arabidopsis*.  
1029 *Plant Physiology*, 125:2, 763–769.
- 1030 Torii, K. U., Mitsukawa, N., Oosumi, T., Matsuura, Y., Yokoyama, R., Whittier, R. F.,  
1031 Komeda, Y. (1996). The *Arabidopsis* ERECTA gene encodes a putative receptor protein  
1032 kinase with extracellular leucine-rich repeats. *The Plant Cell*, 8:4, 735–746.
- 1033 Uchida, N., Lee, J. S., Horst, R. J., Lai, H.-H., Kajita, R., Kakimoto, T., et al. (2012).  
1034 Regulation of inflorescence architecture by intertissue layer ligand-receptor  
1035 communication between endodermis and phloem. *Proceedings of the National Academy*  
1036 *of Sciences of the United States of America*, 109:16, 6337–6342.
- 1037 Uchida, N., Shimada, M., Tasaka, M. (2013). ERECTA-family receptor kinases regulate stem  
1038 cell homeostasis via buffering its cytokinin responsiveness in the shoot apical meristem.  
1039 *Plant and Cell Physiology*, 54:3, 343-351.
- 1040 Wagner, T. A., Kohorn, B. D. (2001). Wall-associated kinases are expressed throughout  
1041 plant development and are required for cell expansion. *The Plant Cell*, 13:2, 303–318.
- 1042 Wang, Z., Wang, J., Bao, Y., Wu, Y., Zhang, H. (2010). Quantitative trait loci controlling  
1043 rice seed germination under salt stress. *Euphytica*, 178:3, 297–307.
- 1044 Wang, A., Garcia, D., Zhang, H., Feng, K., Chaudhury, A., Berger, F., Peacock, W.J.,  
1045 Dennis, E.S., Luo, M. (2010). The VQ motif protein IKU1 regulates endosperm growth  
1046 and seed size in *Arabidopsis*. *Plant Journal* 63: 670–679.
- 1047 Weitbrecht, K., Muller, K., Leubner-Metzger, G. (2011). First off the mark: early seed  
1048 germination. *Journal of Experimental Botany*, 62:10, 3289–3309.
- 1049 Western, T. L., Skinner, D. J., Haughn, G. W. (2000). Differentiation of mucilage secretory  
1050 cells of the *Arabidopsis* seed coat. *Plant Physiology*, 122:2, 345–355.
- 1051 Western, T. (2012). The sticky tale of seed coat mucilages: production, genetics, and role in  
1052 seed germination and dispersal. *Seed Science Research*, 22, 1-25.
- 1053 Wharton, M. J. (1955). The use of tetrazolium test for determining the viability of seeds of  
1054 the genus *Brassica*. *Proceedings of the International Seed Test Association*. 20, 81-88.
- 1055 Willats, W., Knox, J. P., Mikkelsen, J. D. (2006). Pectin: new insights into an old polymer  
1056 are starting to gel. *Trends in Food Science and Technology*, 17, 97-104.
- 1057 Xing, H.T., Guo, P., Xia, X.L., Yin, W.L. (2011). PdERECTA, a leucine-rich repeat receptor-  
1058 like kinase of poplar, confers enhanced water use efficiency in *Arabidopsis*. *Planta*, 234,

- 1059 229-241.
- 1060 Yamaguchi T., Blumwald E. (2005). Developing salt-tolerant crop plants: challenges and  
1061 opportunities. *Trends in Plant Sciences*, 10:12, 615–620.
- 1062 Yang, X., Dong, M., Huang, Z. (2010). Role of mucilage in the germination of *Artemisia*  
1063 *sphaerocephala* (Asteraceae) achenes exposed to osmotic stress and salinity. *Plant*  
1064 *Physiology and Biochemistry*, 48:2-3, 131–135.
- 1065 Yu, Y., Wang, J., Shi, H., Gu, J., Dong, J., Deng, X. W., Huang, R. (2016). Salt stress and  
1066 ethylene antagonistically regulate nucleocytoplasmic partitioning of COP1 to control  
1067 seed germination. *Plant Physiology*, 170, 2340-2350
- 1068 Yuan, K., Rashotte, A. M., Wysocka-Diller, J. W. (2010). ABA and GA signaling pathways  
1069 interact and regulate seed germination and seedling development under salt stress. *Acta*  
1070 *Physiologiae Plantarum*, 33:2, 261–271.
- 1071 Yuan, W., Flowers, J. M., Sahraie, D. J., Purugganan, M. D. (2016). Cryptic genetic variation  
1072 for *arabidopsis thaliana* seed germination speed in a novel salt stress environment. *G3*  
1073 (Bethesda, Md.), 6:10, 3129–3138.
- 1074 Zheng, J., Yang, Z., Madgwick, P.J., Camo-Silva, E., Parry, M.A., Hu, Y-G. (2015). TaER  
1075 expression is associated with transpiration efficiency traits and yield in bread wheat.  
1076 *PLOS One*, 10:6, e0128415.
- 1077 Zhou, Y., Zhang, X., Kang, X., Zhao, X., Zhang, X., Ni, M. (2009). SHORT HYPOCOTYL  
1078 UNDER BLUE1 associates with MINISEED3 and HAIKU2 promoters in vivo to  
1079 regulate *Arabidopsis* seed development. *Plant Cell* 21, 06–117.
- 1080 Zhu, J., Lee, B.-H., Dellinger, M., Cui, X., Zhang, C., Wu, S., et al. (2010). A cellulose  
1081 synthase-like protein is required for osmotic stress tolerance in *Arabidopsis*. *Plant*  
1082 *Journal*, 63:1, 128–140.

1083  
1084  
1085

## 1086 **Figure Legends**

1087

1088 **Figure 1. The three ERECTA family members synergistically control the timing and**  
1089 **pace of seed germination under salinity.**

1090 **A, B**,  $T_{50}$  values (h post-stratification) for testa rupture (**A**) and endosperm rupture (**B**). **C**,  
1091 Time interval (h) between the two steps. Experiment repeated 5 times with different seed

1092 batches. As the triple mutant is sterile, the segregating progeny of *er erl1*+/- *erl2* plants  
1093 was used to investigate germination of triple mutant seeds, and is referred to in text and  
1094 figures as *er erl1/seg erl2*. **A-C**, Values are means and s.e.m. (n = 4 plates, 30 seeds per  
1095 genotype per plate). Different letters above bars denote significant differences by two-way  
1096 ANOVA and Tukey HSD pair-wise tests ( $P \leq 0.001$ ).

1097

1098 **Figure 2. Germination-specific function of the ERf on sensitivity to salinity.**

1099 **A-D**, Time-course of endosperm rupture for *er*, *er erl1*, *er erl2* or *er erl1/seg erl2* seeds over  
1100 a 10 d incubation period on 0 (**A, C**) or 150 mM NaCl agar media (**B, D**) following  
1101 imbibition and stratification either directly on media (**A, B**) or in water prior to plating (**C,**  
1102 **D**). **E**, Seedling relative expansion rates ( $d^{-1}$ ) on 0 or 150 mM NaCl media. Seeds were first  
1103 germinated on NaCl-free media and then transferred to fresh 0 mM or 150 mM NaCl plates  
1104 for monitoring their expansion over the next 72 h, measurements of whole seedling projected  
1105 area on images captured using *ImageJ*. Different letters indicate significant differences by  
1106 two-way ANOVA and Tukey HSD pair-wise tests ( $P \leq 0.001$ ), n = 7.

1107

1108 **Fig 3. ERf transcripts are present in mature dry seeds and ERf de novo transcription is**  
1109 **activated early during germination.**

1110 *ERf* gene expression in WT dry seeds (“Dry”) and germinating seeds at: the end of imbibition  
1111 and stratification (stage I); 20 h later (stage II, testa rupture); and 52 h later (stage III-G,  
1112 endosperm rupture completed on control media). Non-germinated seeds at that time on 150  
1113 mM NaCl (label III-NG) were sampled and analysed separately. Different letters indicate  
1114 significant differences by two-way ANOVA and Tukey HSD pair-wise tests  
1115 ( $P \leq 0.001$ ), n=4 seed pools per genotype and treatment, of 300 seeds each. The  
1116 experiment was repeated 3 times.

1117

1118 **Figure 4. The ERf regulates seed germination sensitivity to salinity mostly via**  
1119 **interactions with its ionic effects, but is also involved in the control of germination**  
1120 **under osmotic stress.**

1121 **A**, Percentage of seeds with endosperm rupture for WT and the NaCl hyper-sensitive mutants  
1122 *er erl1*, *er erl2*, and *er erl1/seg erl2*, on day 1, 2, 3 and 7 post-stratification as a function of  
1123 media osmotic pressure ( $\pi_e$ ) varied through supplementation of PEG\_8000 at concentrations  
1124 ranging from 0 to 171 g L<sup>-1</sup>. n=100-200 seeds per replicate. **B**, Germination response over an  
1125 extended range of PEG concentrations, in an independent experiment with a different seed  
1126 batch. Data points depict the percentage of seeds exhibiting endosperm rupture 6d post-  
1127 stratification. n= 100-200 seeds per replicate. **C**, Kinetics of seed germination under 0.99  
1128 MPa  $\pi_e$  induced by NaCl. Same seed batch as in **(B)**. The arrow points to germination scores  
1129 on d6 when, under iso-osmotic conditions induced by PEG, at least 90% seeds had  
1130 germinated (see panel **B**). n = 3 plates, 30 seeds per plate and per genotype. Experiments  
1131 replicated 3 times.

1132

1133 **Figure 5. Seed germination in the salinity hypersensitive *er*, *er erl1*, *er erl2* and *er***  
1134 ***erl1/seg erl2* mutants is more sensitive to external NaCl than KCl concentrations under**  
1135 **iso-osmotic conditions.**

1136 Time-course of germination under iso-osmotic conditions (media osmotic pressure,  $\pi_e$ )  
1137 induced by supplementation of either NaCl or KCl. Percentages of seeds exhibiting  
1138 endosperm rupture 4 d post-stratification (means and s.e.m.; n = 3 plates, 30 seeds per plate  
1139 and per genotype; experiments replicated twice).

1140

1141 **Figure 6. Seed germination readily resumes upon salinity stress removal.**

1142 Time-course of seed germination on 150 mM NaCl media (0-490 h), and after transfer to  
1143 NaCl-free media (arrow on x-axis). The experiment was repeated 3 times. Values are means  
1144 and s.e.m. (n = 4 plates, 30 seeds per genotype per plate). Different letters above data points  
1145 denote significant genetic differences at each time point by one-way ANOVA and Tukey  
1146 HSD pair-wise tests ( $P < 0.05$ ). “NS” at the final time point indicates that genetic  
1147 differences were non-statistically significant by one-way ANOVA.

1148

1149 **Figure 7. The ERF interacts with the sensitivity of seed germination to exogenous ABA**  
1150 **and with the expression of major ABA and GA signalling genes.**

1151 **A**, Germination response to exogenous ABA application. Data points represent  $T_{50}$  values  
1152 and s.e.m. for testa rupture (**A**) and endosperm rupture (**B**) ( $n = 3$  plates, with 30 seeds of  
1153 each genotype). The experiment was repeated 3 times. **C**, *ABI3*, *ABI5*, *RGL2* and *DOG1*  
1154 gene expression in dry seeds (“Dry”) and seeds sampled at: the end of imbibition and  
1155 stratification (stage I); 20 h later (stage II, testa rupture); and 52 h later (stage III-G,  
1156 endosperm rupture). Non-germinated seeds on 150 mM NaCl media (label III-NG) were  
1157 analysed separately. **A-C**, Different letters indicate significant differences by two-way  
1158 ANOVA and Tukey HSD pair-wise tests ( $P \leq 0.05$ ).

1159

1160 **Figure 8. The ERF function in seed germination sensitivity to salinity is maternally**  
1161 **controlled and shows partial overlap with an ERF function in the determination of seed**  
1162 **size.**

1163 **A**, Seed projected area ( $\text{mm}^2$ ); means and s.e.m. ( $n \geq 400$  seeds per genotype, from 11  
1164 siliques). Letters indicate significant differences by one-way ANOVA and Tukey HSD pair-  
1165 wise tests ( $P \leq 0.001$ ). **B**, Relative expansion rate ( $\text{mm}^2 \text{mm}^{-2} \text{d}^{-1}$ ) of mature embryos  
1166 excised from enclosing tissues, over a 72 h incubation period on 0 or 150 mM NaCl media, ( $n$   
1167 = 7). Different letters indicate significant differences by two-way ANOVA and Tukey  
1168 HSD pair-wise tests ( $P \leq 0.001$ ). **C**, Time-course of germination for WT and *er erll*  
1169 seeds, and F1 seeds generated from their reciprocal crosses. Similar results were obtained  
1170 from crosses between WT and *er erl2* flowers (data not shown). **D**, Size of F1 seeds from  
1171 reciprocal crosses between WT and *er erll +/- erl2* flowers ( $n=86$  to 143 seeds per cross).  
1172 Different letters indicate significant differences by one-way ANOVA and Tukey HSD  
1173 pair-wise tests ( $P \leq 0.001$ ). **C-D**, Crosses were made between flowers at similar positions  
1174 on the main inflorescence; seeds were harvested at the same time, 3 weeks after crossing.

1175

1176 **Figure 9. The ERF is involved in the control of seed coat permeability mucilage**  
1177 **composition and salinity-dependent role in the regulation of germination speed.**

1178 **A**, Seed coat permeability to tetrazolium red ( $n = 4$  seed pools; some s.e.m. are hidden by  
1179 symbols). \* denotes statistical significance ( $P \leq 0.001$ ) by two-way ANOVA and Scheffe  
1180 post-hoc test. **B**, Seed sodium content 24 h post-stratification on 0 mM or 150 mM NaCl  
1181 media, ( $n=3$  seed pools). Letters indicate significant differences by two-way ANOVA and  
1182 Tukey HSD pair-wise tests ( $P = 0.42$  and  $0.39$  for genotype effect under control and salt

1183 treatment, respectively). **C**, Correlation between mass of water soluble mucilage per seed and  
1184 seed size. Means and s.e.m. (n = 4 seed pools per genotype, 40 mg seeds per pool, average  
1185 seed weight and area determined on sub-aliquots; experiment replicated 3 times). Regression  
1186 lines: 0 mM NaCl,  $y=36.6x-0.20$ ,  $r^2=0.84$ ; 150 mM NaCl,  $y=36.3x+0.002$ ,  $r^2=0.81$ . Similar  
1187 results were obtained with size expressed as area. **D**, GalUA/Gal and Rhm/Xyl ratios. Letters  
1188 besides points indicate statistical significance of differences in GalUA/Gal ( $P<0.05$ ) by one-  
1189 way ANOVA and Tukey post-hoc tests, compared to all unlabelled data points.  $P=0.08$  for  
1190 differences in Rhm/Xyl between *er erl1/seg erl2* and WT. **E**, Testa rupture (TeR) and  
1191 endosperm rupture (EnR)  $T_{50}$  values for intact seeds and “demucilaged” seeds. Mean values  
1192 per genotype (n = 3 plates; 30 seeds per genotype per plate). Labelled points denote  
1193 genotypes where removal of the outer water soluble mucilage significantly advanced  
1194 germination on 150 mM NaCl media. The 1:1 line represents the bisectrix, where mucilage  
1195 removal is neutral. **F**, *TCH3* gene expression in WT and *er erl1/seg erl2* dry and imbibed  
1196 seeds during the three germination phases, n=4 seed pools per genotype and NaCl condition,  
1197 of 300 seeds each.

1198

1199 **Supplementary Figure S1. NaCl-dependent effects of reduced ERF signaling on the**  
1200 **timing and pace of seed germination.**

1201 **A-D**, Percentages of seeds exhibiting testa rupture (**A**, **C**) and endosperm rupture (**B**, **D**) on 0  
1202 mM NaCl (**A**, **B**) and 150 mM NaCl media (**C**, **D**) as a function of time (h post-stratification).  
1203 Data points are means and s.e.m. (n = 4 plates per condition, 30 seeds per genotype in each  
1204 plate). The experiment was repeated 5 times.

1205

1206 **Supplementary Figure S2. Loss of ER alone or in combination with ERL1 and ERL2**  
1207 **sensitises seed germination to salinity in a dose-dependent manner.**

1208 **A**, Percentages of seeds exhibiting endosperm rupture 4 d post-stratification on 0, 100, 150 or  
1209 200 mM NaCl (means and s.e.m.; n = 3 plates per condition, 30 seeds per genotype per  
1210 plate). The experiment was repeated 3 times. **B**, Percentages of germinated seeds over a 10 d  
1211 incubation period on 200 mM NaCl media for WT and the four NaCl-hypersensitive *erf*  
1212 mutants. Different letters indicate significant differences by one-way ANOVA and Tukey  
1213 HSD pair-wise tests ( $P \leq 0.001$ ), n = 4 plates).

1214

1215 **Supplementary Figure S3. ERf-dependent sensitivity of seed germination to NaCl in an**  
1216 **independent set of *erf* single, double and triple knock-out mutants.**

1217 **A**, *ERL1* and *ERL2* expression is abolished in the *erl1-5* (SALK\_019567), and *erl2-2*  
1218 (SALK\_015275C) mutants. **B**,  $T_{50}$  values for testa and endosperm rupture in WT and *erf*  
1219 mutants carrying the *er2*, *erl1-5*, or *erl2-2* alleles. **C**. Time-interval between testa and  
1220 endosperm rupture. **A-C**. Means and s.e.m. are shown (n = 4 plates, 30 seeds per genotype  
1221 in each plate; experiment replicated 3 times). Different letters indicate significant  
1222 differences by two-way ANOVA and Tukey HSD pair-wise tests ( $P \leq 0.001$ ).

1223

1224 **Supplementary Figure S4. ERf promoter activity in mature dry seeds and germinating**  
1225 **seeds. A-C**, GUS staining patterns for embryos dissected from mature dry seeds, just before  
1226 sowing (**A**), and then from germinating seeds incubated on 0 mM NaCl media (**B**) or 150 mM  
1227 NaCl media (**C**), at the end of stratification (0 h time point) and daily thereafter until all seeds  
1228 had germinated.

1229

1230 **Supplementary Figure S5. Similar sensitivity to salinity stress of selected ABA and GA**  
1231 **biosynthetic gene expression levels in WT and *er erl1/seg erl2* seeds.**

1232 *ABA2*, *NCED9*, *GA3OX1* and *GA3OX2* relative gene expression in dry seeds (“Dry”), after  
1233 imbibition and stratification (I), and at the end of the next two germination phases (stages II,  
1234 III; see Methods; III-NG non-germinated seeds yet on 150 mM NaCl media). n=4 pools of  
1235 seeds per genotype and media, of 300 seeds each). Different letters within each graph indicate  
1236 significant differences by two-way ANOVA and Tukey HSD pair-wise tests ( $P < 0.01$ ).

1237

1238 **Supplementary Figure S6. Mature *er erl1 erl2* embryos exhibit similar radicle size and**  
1239 **patterning than WT seeds.**

1240 **A**, Representative photographs of WT and *er erl1 erl2* mature embryos excised from dry  
1241 seeds dissected out of siliques of the same age and similar positions on the main  
1242 inflorescence. Embryos were cleared and imaged by differential interference microscopy. **B-**



1243 **E**, Morphometric analysis: cotyledon and radicle lengths (**B**); number of hypocotyl cells (**C**);  
1244 cotyledon size (**D**); and number of cotyledon epidermal cells (**E**). \* denotes significant  
1245 differences by 2-tailed paired t-tests ( $P = 0.0011$ ;  $n=5$ ).

1246

1247 **Supplementary Figure S7. Relative abundance of total fatty acid methyl-esters**  
1248 **(FAMES) and relative proportions of individual species in embryos at full seed**  
1249 **maturity.** **A**, Amount of FAMES in mature embryos. Data points show amounts for 4  
1250 independent pools of 50 embryos for each genotype. Genotypes sharing a letter above the  
1251 box are not statistically different by one-way ANOVA and Tukey pair-wise tests  
1252 ( $P \leq 0.05$ ), **B**, Percentages of medium-chain fatty acids (C16, C18; tall bars, dark shade  
1253 colors) and mono-unsaturated fatty acids (shorter bars, paler shade colors); the complements  
1254 to 100% represent long-chain fatty acids (C20,C22) and polyunsaturated fatty acids,  
1255 respectively. **C**, Proportions of individual fatty acids relative to the total amount of FAMES.  
1256 Measurements were done by GC-MS on 4 pools of 50 mature embryos excised from dry  
1257 seeds.

1258

1259 **Supplementary Figure S8. Characteristics of the seed mucilage.** **A, B**, Ruthenium red  
1260 staining of WT and *erf* seed mucilage after 2 h imbibition in 0 mM NaCl (top row) or 150  
1261 mM NaCl solution (bottom row), with gentle shaking (**A**) or in presence of 10 mM Tris-HCl  
1262 without shaking (**B**). Ruthenium red stains acidic pectins. **C**, Proportions (%) of  
1263 monosaccharides in seed water soluble mucilage ( $n = 4$  pools of seeds, 40 mg seeds per  
1264 pool). Genetic differences for individual sugars were not statistically different by one-way  
1265 ANOVA and Tukey HSD pair-wise tests at  $P < 0.05$ , but  $P = 0.055$  to  $0.08$  for differences in  
1266 xylose content between WT and *er*, *er11*, *er er11*, *er er12* and *er er11/seg er12* mucilage. Rhm,  
1267 rhamnose; Ara, arabinose; Xyl, xylose; Man, mannose; Gal, galactose; GalUA, Glucuronic  
1268 acid measured in the water soluble mucilage, which typically represent 60-70% of the total  
1269 Arabidopsis seed mucilage (Ralet et al. 2016).

1270

1271 **Supplementary Table S1. List of genotyping and RT-qPCR primers**

1272



1273

1274

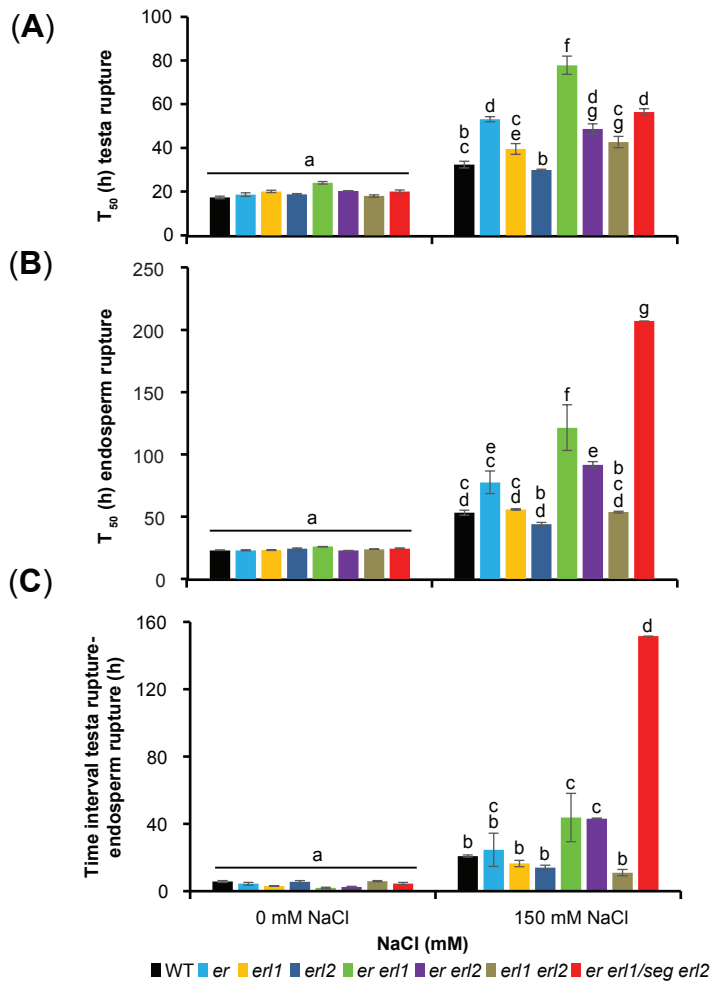

**Figure 1. The three ERECTA family members synergistically control the timing and pace of seed germination under salinity.**

**A, B,**  $T_{50}$  values (h post-stratification) for testa rupture (**A**) and endosperm rupture (**B**). **C,** Time interval (h) between the two steps. Experiment repeated 5 times with different seed batches. As the triple mutant is sterile, the segregating progeny of *er erl1* +/- *erl2* plants was used to investigate germination of triple mutant seeds, and is referred to in text and figures as *er erl1/seg erl2*. **A-C,** Values are means and s.e.m. ( $n = 4$  plates, 30 seeds per genotype per plate). Different letters above bars denote significant differences by two-way ANOVA and Tukey HSD pair-wise tests ( $P < 0.001$ ).

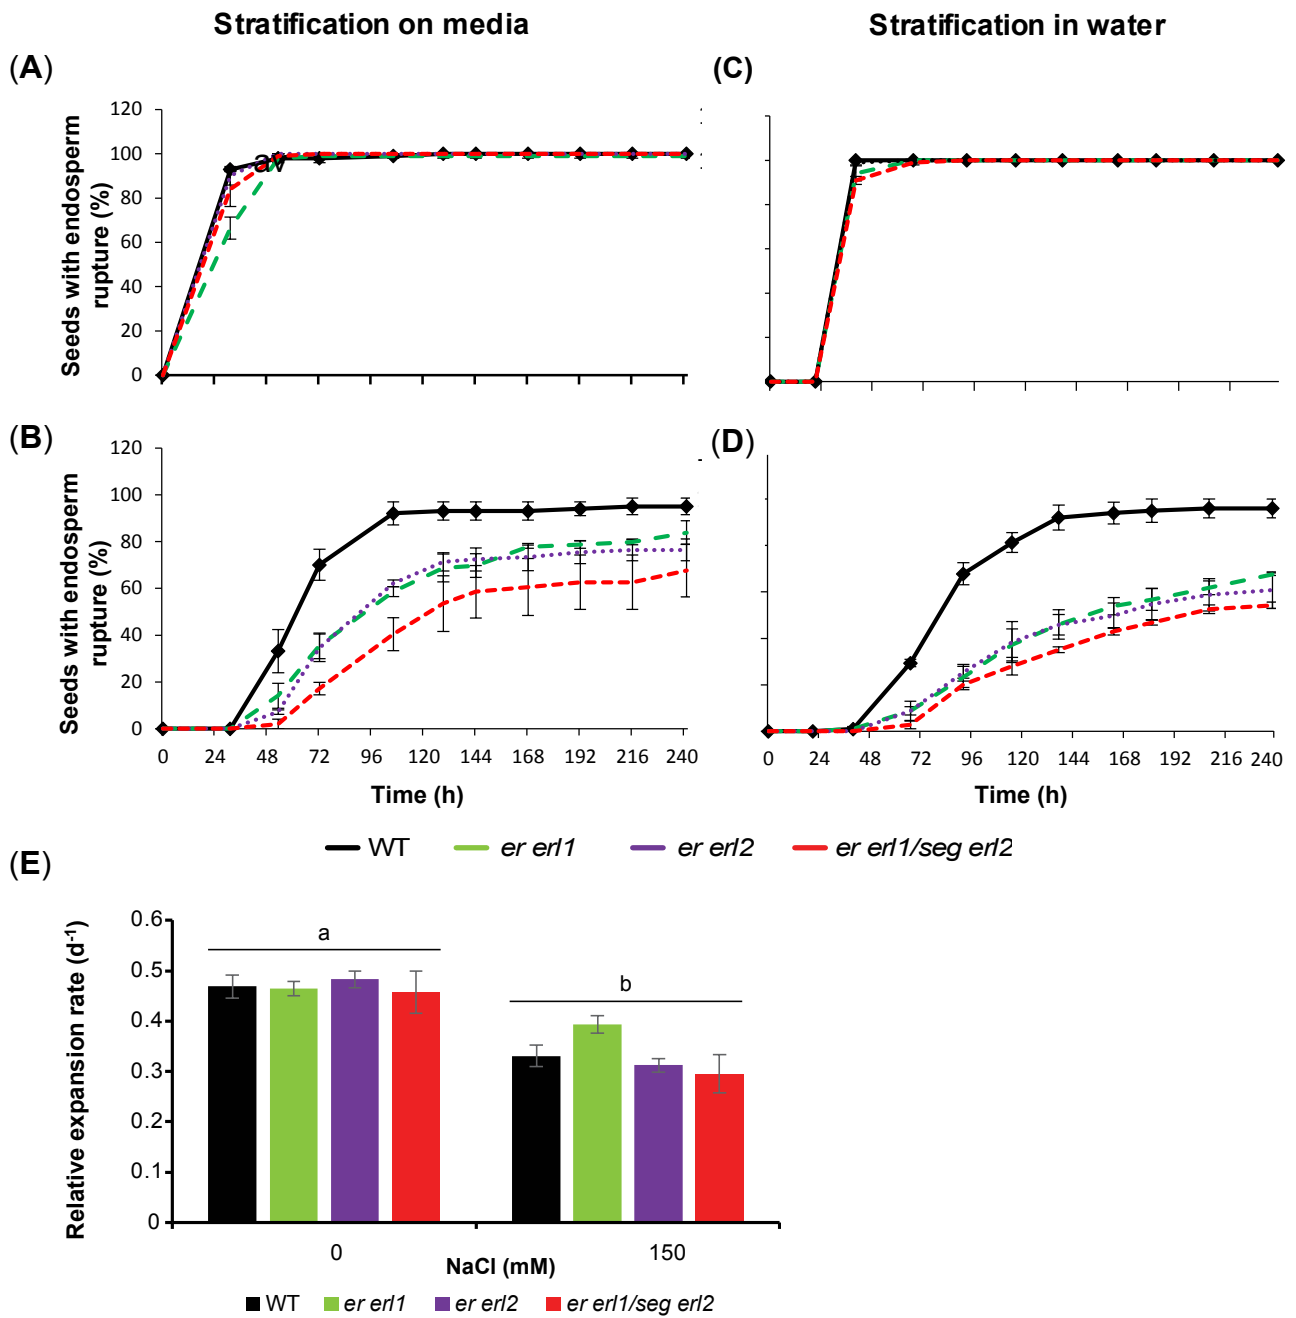

**Figure 2. Germination-specific function of the ERF on sensitivity to salinity.**

**A-D**, Time-course of endosperm rupture for *er*, *er erl1*, *er erl2* or *er erl1/seg erl2* seeds over a 10 d incubation period on 0 (**A, C**) or 150 mM NaCl agar media (**B, D**) following imbibition and stratification either directly on media (**A, B**) or in water prior to plating (**C, D**). **E**, Seedling relative expansion rates ( $d^{-1}$ ) on 0 or 150 mM NaCl media. Seeds were first germinated on NaCl-free media and then transferred to fresh 0 mM or 150 mM NaCl plates for monitoring their expansion over the next 72 h, measurements of whole seedling projected area on images captured using *ImageJ*. Different letters indicate significant differences by two-way ANOVA and Tukey HSD pair-wise tests ( $P < 0.001$ ),  $n = 7$ .

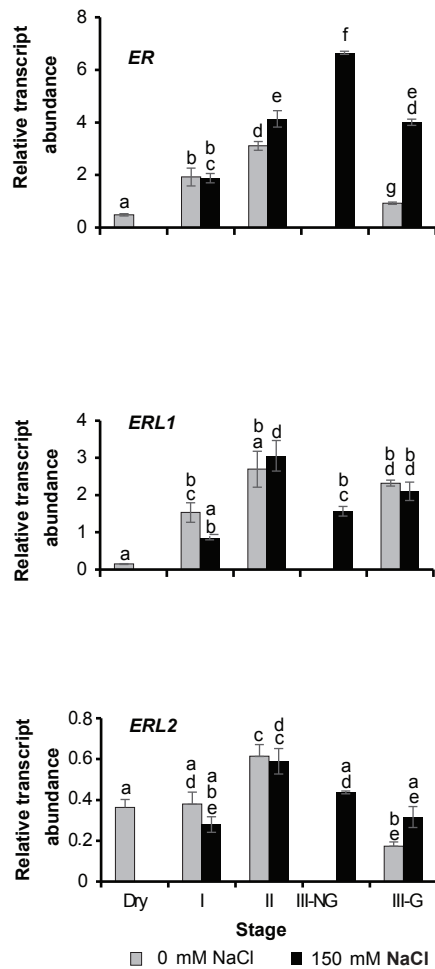

**Fig 3. *ERf* transcripts are present in mature dry seeds and *ERf de novo* transcription is activated early during germination.**

*ERf* gene expression in WT dry seeds (“Dry”) and germinating seeds at: the end of imbibition and stratification (stage I); 20 h later (stage II, testa rupture); and 52 h later (stage III-G, endosperm rupture completed on control media). Non-germinated seeds at that time on 150 mM NaCl (label III-NG) were sampled and analysed separately. Different letters indicate significant differences by two-way ANOVA and Tukey HSD pair-wise tests ( $P < 0.001$ ),  $n=4$  seed pools per genotype and treatment, of 300 seeds each. The experiment was repeated 3 times.

**Fig. 4**

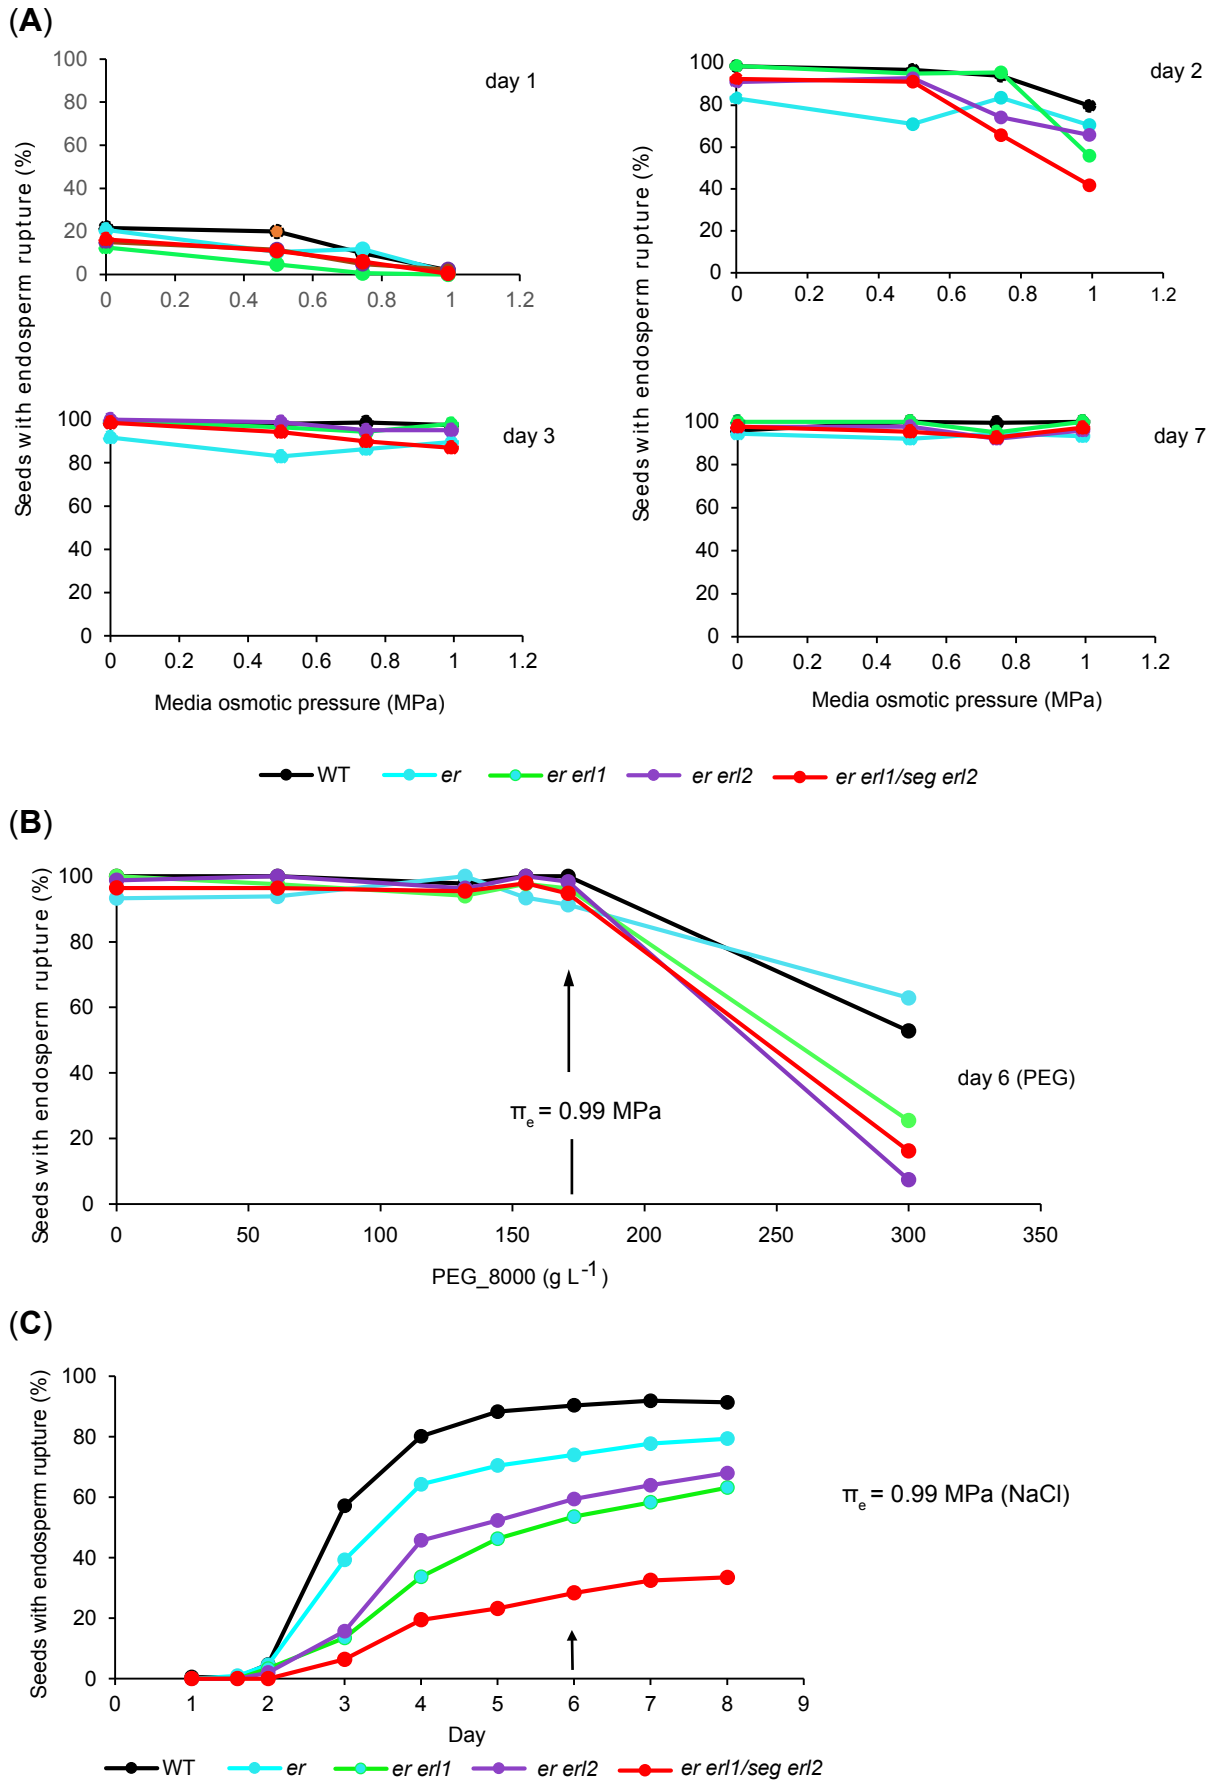

**Figure 4. The ERf regulates seed germination sensitivity to salinity mostly via interactions with its ionic effects, but is also involved in the control of germination under osmotic stress.**

**A**, Percentage of seeds with endosperm rupture for WT and the NaCl hyper-sensitive mutants *er erl1*, *er erl2*, and *er erl1/seg erl2*, on day 1, 2, 3 and 7 post-stratification as a function of media osmotic pressure ( $\pi_e$ ) varied through supplementation of PEG\_8000 at concentrations ranging from 0 to 171g L<sup>-1</sup>. n=100-200 seeds per replicate. **B**, Germination response over an extended range of PEG concentrations, in an independent experiment with a different seed batch. Data points depict the percentage of seeds exhibiting endosperm rupture 6d post-stratification. n= 100-200 seeds per replicate. **C**, Kinetics of seed germination under 0.99 MPa  $\pi_e$  induced by NaCl. Same seed batch as in **(B)**. The arrow points to germination scores on d6 when, under iso-osmotic conditions induced by PEG, at least 90% seeds had germinated (see panel **B**). n = 3 plates, 30 seeds per plate and per genotype. Experiments replicated 3 times.

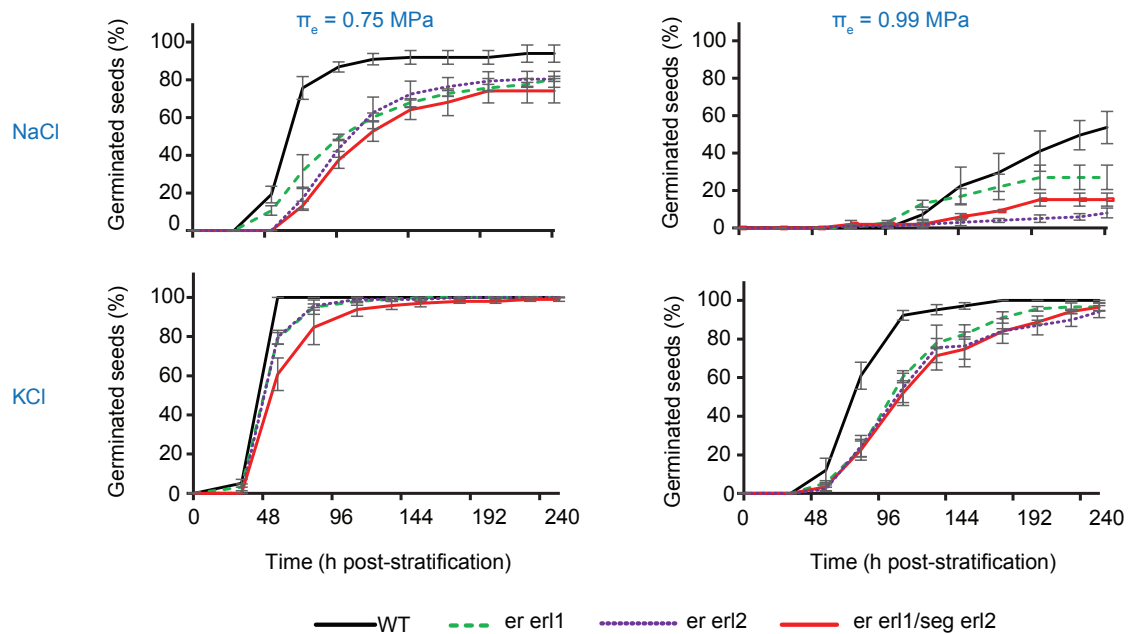

**Figure 5. Seed germination in the salinity hypersensitive *er*, *er erl1*, *er erl2* and *er erl1/seg erl2* mutants is more sensitive to external NaCl than KCl concentrations under iso-osmotic conditions.**

Time-course of germination under iso-osmotic conditions (media osmotic pressure,  $\pi_e$ ) induced by supplementation of either NaCl or KCl. Percentages of seeds exhibiting endosperm rupture 4 d post-stratification (means and s.e.m.; n = 3 plates, 30 seeds per plate and per genotype; experiments replicated twice).



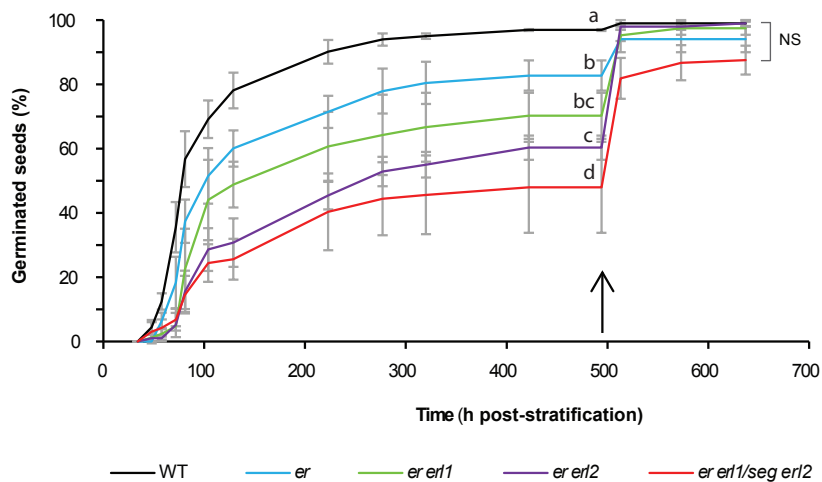

**Figure 6. Seed germination readily resumes upon salinity stress removal.**

Time-course of seed germination on 150 mM NaCl media (0-490 h), and after transfer to NaCl-free media (arrow on x-axis). The experiment was repeated 3 times. Values are means and s.e.m. (n = 4 plates, 30 seeds per genotype per plate). Different letters above data points denote significant genetic differences at each time point by one-way ANOVA and Tukey HSD pair-wise tests ( $P < 0.05$ ). “NS” at the final time point indicates that genetic differences were non-statistically significant by one-way ANOVA.

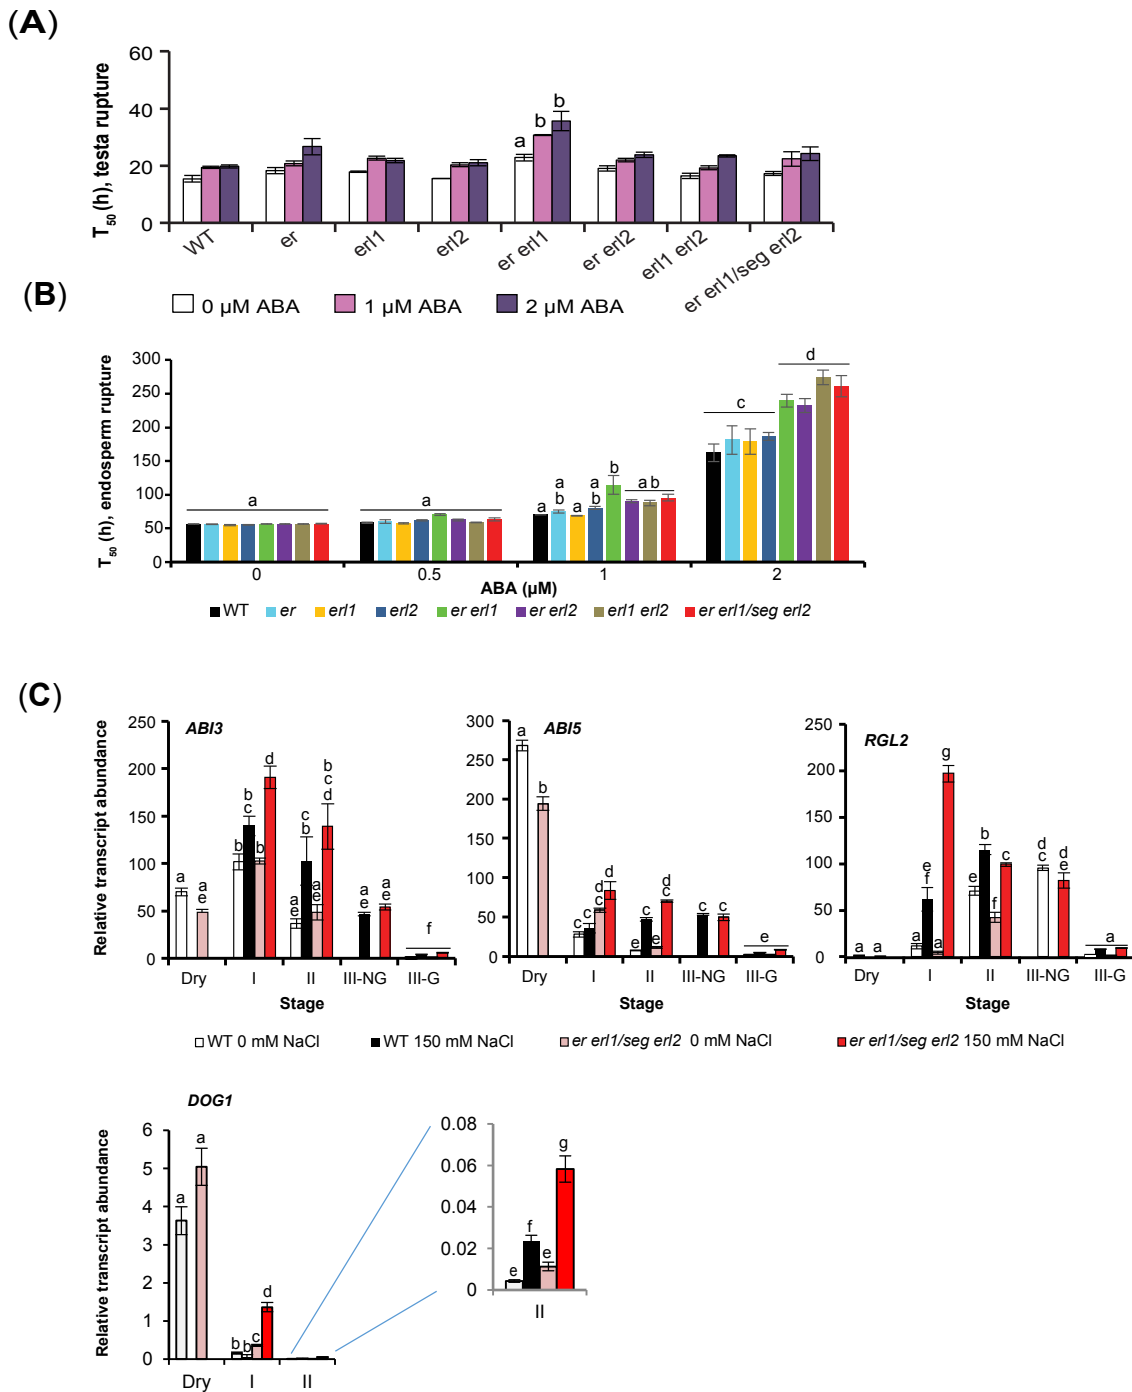

**Figure 7. The ERf interacts with the sensitivity of seed germination to exogenous ABA and with the expression of major ABA and GA signalling genes.**

**A, B,** Germination response to exogenous ABA application. Data points represent  $T_{50}$  values and s.e.m. for testa rupture (**A**) and endosperm rupture (**B**) ( $n = 3$  plates, with 30 seeds of each genotype). The experiment was repeated 3 times. **C,** *ABI3*, *ABI5*, *RGL2* and *DOG1* gene expression in dry seeds (“Dry”) and seeds sampled at: the end of imbibition and stratification (stage I); 20 h later (stage II, testa rupture); and 52 h later (stage III-G, endosperm rupture). Non-germinated seeds on 150 mM NaCl media (label III-NG) were analysed separately. **A-C,** Different letters indicate significant differences by two-way ANOVA and Tukey HSD pair-wise tests ( $P < 0.05$ ).

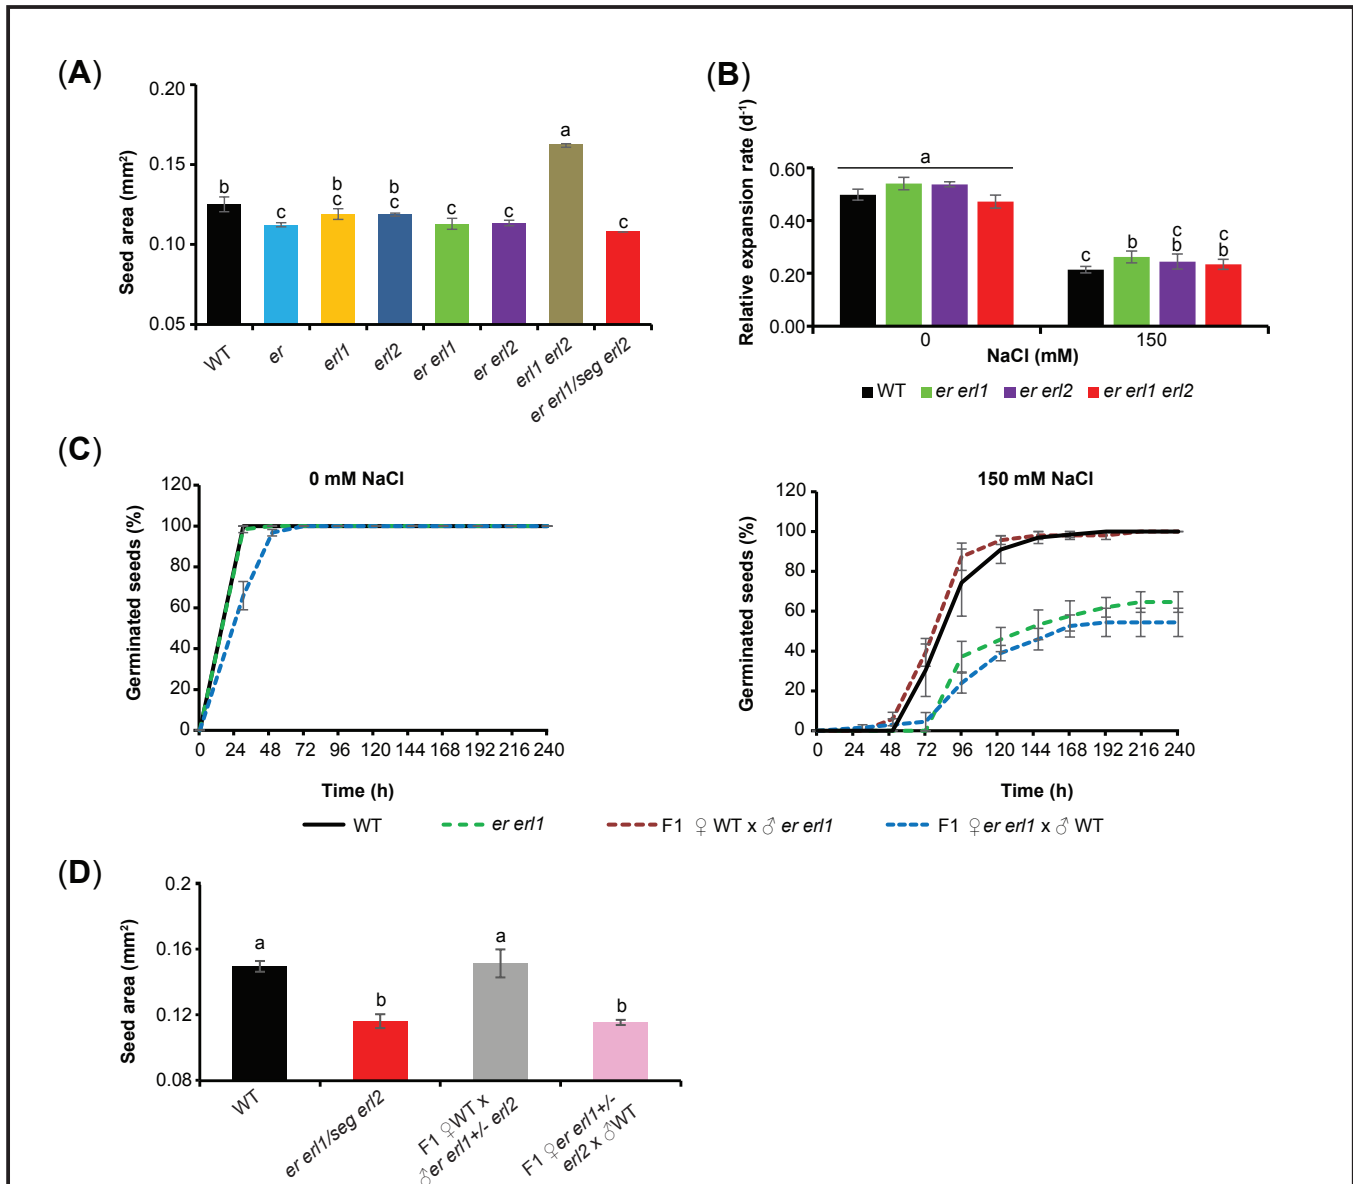

**Figure 8. The ERf function in seed germination sensitivity to salinity is maternally controlled and shows partial overlap with an ERf function in the determination of seed size.**

**A**, Seed projected area (mm<sup>2</sup>); means and s.e.m. (n ≥ 400 seeds per genotype, from 11 siliques). Letters indicate significant differences by one-way ANOVA and Tukey HSD pair-wise tests ( $P < 0.001$ ). **B**, Relative expansion rate (mm<sup>2</sup> mm<sup>-2</sup> d<sup>-1</sup>) of mature embryos excised from enclosing tissues, over a 72 h incubation period on 0 or 150 mM NaCl media, (n = 7). Different letters indicate significant differences by two-way ANOVA and Tukey HSD pair-wise tests ( $P < 0.001$ ). **C**, Time-course of germination for WT and *er erl1* seeds, and F1 seeds generated from their reciprocal crosses. Similar results were obtained from crosses between WT and *er erl2* flowers (data not shown). **D**, Size of F1 seeds from reciprocal crosses between WT and *er erl1 +/- erl2* flowers (n=86 to 143 seeds per cross). Different letters indicate significant differences by one-way ANOVA and Tukey HSD pair-wise tests ( $P < 0.001$ ). **C-D**, Crosses were made between flowers at similar positions on the main inflorescence; seeds were harvested at the same time, 3 weeks after crossing.

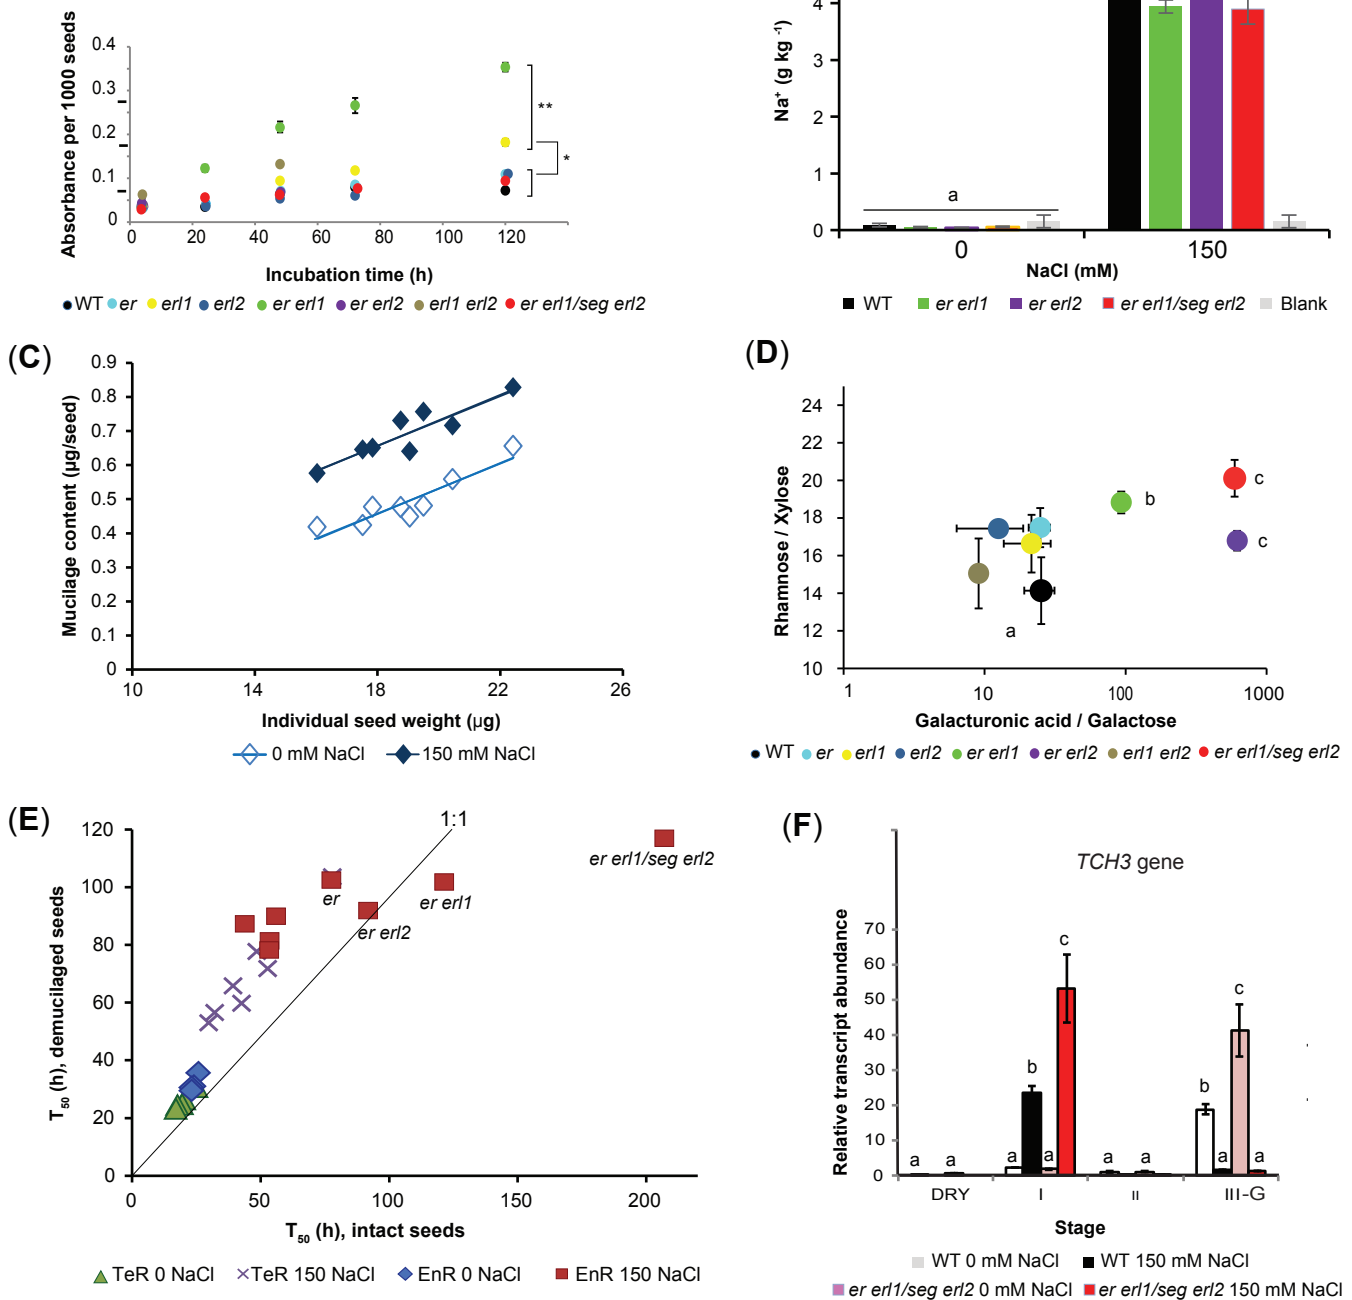

**Figure 9. The ERF is involved in the control of seed coat permeability, mucilage composition and salinity-dependent role in the regulation of germination speed.**

**A**, Seed coat permeability to tetrazolium red (n = 4 seed pools of 50 mg each; some s.e.m. are hidden by symbols). \* denotes statistical significance (P < 0.001) by two-way ANOVA and Scheffé post-hoc test. **B**, Seed sodium content 24 h post-stratification on 0 mM or 150 mM NaCl media, (n=3 seed pools). Letters indicate significant differences by two-way ANOVA and Tukey HSD pair-wise tests (P = 0.42 and 0.39 for genotype effect under control and salt treatment, respectively). **C**, Correlation between mass of water soluble mucilage per seed and seed size. Means and s.e.m. (n = 4 seed pools per genotype, 40 mg seeds per pool, average seed weight and area determined on sub-aliquots; experiment replicated 3 times). Regression lines: 0 mM NaCl,  $y = 36.6x - 0.20$ ,  $r^2 = 0.84$ ; 150 mM NaCl,  $y = 36.3x + 0.002$ ,  $r^2 = 0.81$ . Similar results were obtained with size expressed as area. **D**, GalUA/Gal and Rhm/Xyl ratios. Letters besides points indicate statistical significance of differences in GalUA/Gal (P < 0.05) by one-way ANOVA and Tukey post-hoc tests, compared to all unlabelled data points. P = 0.08 for differences in Rhm/Xyl between *er er1/seg er2* and WT. **E**, Testa rupture (TeR) and endosperm rupture (EnR) T<sub>50</sub> values for intact seeds and “demucilaged” seeds. Mean values per genotype (n = 3 plates; 30 seeds per genotype per plate). Labelled points denote genotypes where removal of the outer water soluble mucilage significantly advanced germination on 150 mM NaCl media. The 1:1 line represents the bisectrix, where mucilage removal is neutral. **F**, TCH3 gene expression in WT and *er er1/seg er2* dry and imbibed seeds during the three germination phases, n=4 seed pools per genotype and NaCl condition, of 300 seeds each.
